1 **Title**

2 PalaeoChip Arctic1.0: An optimised eDNA targeted enrichment approach to reconstructing past  
3 environments

4 **Summary**

5 Ancient environmental DNA has been established as a viable biomolecular proxy for tracking  
6 taxonomic presence through time in a local environment, even in the total absence of primary  
7 tissues. It is thought that sedimentary ancient DNA (sedaDNA) survives through mineral  
8 binding. And while these organo-mineral complexes likely facilitate long-term preservation, they  
9 also challenge our ability to release and isolate target molecules. Two limitations in sedaDNA  
10 extraction impede many palaeoenvironmental reconstructions: the post-extraction carryover of  
11 enzymatic inhibitors, and sedaDNA loss when attempting to reduce inhibitor co-elution. Here,  
12 we present an optimised eDNA targeted enrichment approach for reconstructing past  
13 environments. Our new extraction protocol with targeted enrichment averages a 14.6-fold  
14 increase in on-target plant and animal DNA compared to a commercial soil extraction kit, and a  
15 22.6-fold increase compared to a PCR metabarcoding approach. To illustrate the effectiveness of  
16 the PalaeoChip Arctic1.0 protocol, we present results of plant and animal presence from  
17 permafrost samples and discuss new potential evidence for the late survival (ca. 9685 BP) of  
18 mammoth (*Mammuthus sp.*) and horse (*Equus sp.*) in the Klondike Region of Yukon, Canada.  
19 This approach translates to a more diverse and sensitive dataset with increased sequencing  
20 efficiency of ecologically informative sedaDNA.

21

22 **Authors and Affiliations**

23 Tyler J. Murchie<sup>1,2\*</sup>, Melanie Kuch<sup>1,2</sup>, Ana Duggan<sup>1,2</sup>, Marissa L. Ledger<sup>3</sup>, Kévin Roche<sup>4,5</sup>,  
24 Jennifer Klunk<sup>1,6</sup>, Emil Karpinski<sup>1,6</sup>, Dirk Hackenberger<sup>1,7</sup>, Tara Sadoway<sup>1,8</sup>, Ross MacPhee<sup>9</sup>,  
25 Duane Froese<sup>10</sup>, Hendrik Poinar<sup>1,2,7\*</sup>

26

27 <sup>1</sup>McMaster Ancient DNA Centre, McMaster University, Canada.

28 <sup>2</sup>Department of Anthropology, McMaster University, Canada.

29 <sup>3</sup>Department of Archaeology, University of Cambridge, United Kingdom.

30 <sup>4</sup>University of Bourgogne Franche-Comté, France.

31 <sup>5</sup>University of Bordeaux Montaigne, France.

32 <sup>6</sup>Department of Biology, McMaster University, Canada.

33 <sup>7</sup>Department of Biochemistry, McMaster University, Canada.

34 <sup>8</sup>University Health Network, Toronto.

35 <sup>9</sup>Division of Vertebrate Zoology/Mammalogy, American Museum of Natural History.

36 <sup>10</sup>Earth and Atmospheric Sciences, University of Alberta.

37 \*corresponding authors

38 **Author contributions:**

39 TJM: Research design, wet-lab processing, analysis, figure design, writing

40 MK: Research design, wet-lab processing, manuscript editing

41 AD: Bioinformatic assistance, analysis, manuscript editing

42 MLL: Laboratory assistance, writing, manuscript editing

43 KR: Laboratory assistance

44 JK: Laboratory and research design assistance

45 EK: Research design assistance, initial experiments with 4°C spin, manuscript editing

46 DH: Initial experiments with 4°C spin

47 TS: Metabarcoding and preliminary analyses of cores, core collection, manuscript editing

48 RM: Research design, manuscript editing, collaborative principal investigator

49 DF: Research design, analysis, manuscript editing, core collection, collaborative principal  
50 investigator

51 HP: Research design, analysis, manuscript editing, McMaster Ancient DNA Centre principal  
52 investigator

53

54

## 55 **Introduction**

56 Means of recovering and analyzing ecologically informative sedimentary ancient DNA  
57 (sedaDNA) have improved substantially thanks to ongoing developments in high-throughput  
58 sequencing (HTS) technologies (Taberlet et al., 2018). SedaDNA molecules have been  
59 successfully recovered to evaluate the ‘local’ (Parducci et al., 2017, p. 930; Rawlence et al.,  
60 2014, p. 616) diachronic presence of animals (Giguët-Covex et al., 2014; Graham et al., 2016;  
61 Haile et al., 2009; Pedersen et al., 2016; Slon et al., 2017), plants (Alsos et al., 2015; Anderson-  
62 Carpenter et al., 2011; Epp et al., 2015; Niemeyer et al., 2017; Willerslev et al., 2014), fungi  
63 (Bellemain et al., 2013), microbiota (Ahmed et al., 2018; D’Costa et al., 2011), and eukaryotic  
64 parasites (Søe et al., 2018) from a diverse range of depositional settings. It is thought that much  
65 of sedaDNA survives in the absence of primary tissues through the formation of organo-mineral  
66 complexes (Arnold et al., 2011; Blum et al., 1997; Gardner and Gunsch, 2017; Greaves and  
67 Wilson, 1970; Lorenz and Wackernagel, 1987a, 1987b; Morrissey et al., 2015; Ogram et al.,  
68 1988) as extracellular genetic material binds to common constituents of sediments such as  
69 humics (Crecchio and Stotzky, 1998), calcite (Cleaves et al., 2011), clays (Cai et al., 2006;  
70 Goring and Bartholomew, 1952; Greaves and Wilson, 1969), and silica (Bezanilla et al., 1995;  
71 Lorenz and Wackernagel, 1987a). Soil minerals have been found to stabilize a fraction of  
72 environmental DNA, allowing those molecules to resist decomposition (Morrissey et al., 2015),  
73 but strong mineral binding can also result in marginal sedaDNA release (Alvarez et al., 1998;  
74 Saeki et al., 2010). Extracellular mineral-bound sedaDNA is recovered in bulk in the form of  
75 disseminated biomolecules from a diverse range of organisms. This fact typically prohibits  
76 genomic reconstructions of single individuals, but it can allow for identifying the presence (and  
77 to a lesser extent, absence and potentially even relative abundance) of taxa at ecologically  
78 informative taxonomic ranks. The method shows the most promise in reconstructing palaeoflora  
79 (Anderson-Carpenter et al., 2011; Niemeyer et al., 2017; Pedersen et al., 2016; Sjögren et al.,  
80 2016; Willerslev et al., 2014), or the differential presence of a particular taxon through time  
81 (Graham et al., 2016). A single library can be used to identify sedaDNA from multiple domains  
82 simultaneously with shotgun sequencing or can be targeted to amplify or enrich for specific taxa  
83 of interest.

84 Despite rapid advances in ancient DNA (aDNA) techniques, two extraction related  
85 challenges persist that can limit the ability to fully utilize sedimentary genetic archives: 1) the

86 carryover of enzymatic inhibitors with techniques designed to maximize the recovery of aDNA  
87 characteristic molecules, and 2) the loss, due to overly vigorous inhibitor removal techniques, of  
88 ecologically informative sedaDNA that otherwise might be amenable to adapter ligation or  
89 amplification. To some degree PCR metabarcoding can mitigate inhibition through dilutions or  
90 additional purifications (McKee et al., 2015), with the addition of reagents such as bovine serum  
91 albumin (BSA) (Garland et al., 2010; Kreader, 1996), or with very high polymerase  
92 concentrations (Alsos et al., 2015). However, metabarcoding can be vulnerable to differential  
93 amplification rates due to variable molecular abundance per taxa, unequal damage, variability in  
94 metabarcode amplification efficiency, and PCR conditions (Bellemain et al., 2010; Kanagawa,  
95 2003; Krehenwinkel et al., 2018; Nichols et al., 2018; Sze and Schloss, 2019). These factors  
96 compound downstream biases in taxonomic determinations, especially if there was substantial  
97 loss of low-abundance molecules during inhibitor removal from taxa with comparatively low  
98 biomass turnover (Yoccoz et al., 2012, p. 3651).

99         This study evaluates various inhibitor removal treatments for their ability to reduce the  
100 carryover of enzymatic inhibitors in sedaDNA extracts while maximally retaining endogenous  
101 palaeoenvironmental DNA that can successfully undergo library adapter ligation. Our aim is to  
102 minimize the need for excessive PCR amplification on purified eluates to mitigate the  
103 propagation of stochastic biases. Four previously studied (D'Costa et al., 2011; Mahony, 2015;  
104 Sadoway, 2014) open-air Yukon permafrost core exposures (Table 1, Figure 1) were chosen to  
105 experimentally optimize sedaDNA extraction (detailed in the supplementary materials). We  
106 based these modifications on our in-house lysis solution and high-volume binding buffer silica-  
107 spin column extraction method as per Dabney et al. (2013). Thereafter, an optimized protocol  
108 was selected to evaluate taxonomic assignments between shotgun sequenced and target enriched  
109 datasets with this extraction method, as compared with shotgun and enriched libraries extracted  
110 using the DNeasy PowerSoil DNA extraction kit (QIAGEN) following manufacturer  
111 specifications. For each of the four core sections, sediments were subsampled and homogenized,  
112 then split into three 250 mg replicates for both extraction methods. We also compared this  
113 sequence data with previously sequenced PCR metabarcoding data on the same core sections.  
114 Our sedaDNA modified Dabney et al. (2013) extraction protocol is described here (Figure 2,  
115 SET-E). Experimentation with various inhibition removal techniques are detailed in the  
116 supplementary materials as SET-A through SET-D.

## 117 **Results**

118 Quantitative PCRs (qPCR) on the adapted libraries show an up to 7.0-fold increase in  
119 total adapted DNA among the four core samples (average 3.6-fold increase) with our sedaDNA  
120 modified Dabney et al. (2013) extraction protocol, and an up to 5.6-fold increase in  
121 ‘endogenous’ *trnL* library adapted chloroplast DNA (average 3.0-fold increase) (see Figure 3).  
122 Inhibition indices for our sedaDNA modified Dabney extractions were lower than PowerSoil  
123 (average = 0.75 versus 0.95 for PowerSoil, see methods section 4 and Figure E14 for a  
124 description of the ‘inhibition index’), but this low-level constituent of latent polymerase  
125 inhibitors did not impede enzymes for adapter ligation as these samples quantify much higher  
126 than PowerSoil extracts post-library prep. Our ongoing experiments with a diverse range of other  
127 sediments suggest that extracts with inhibition indices over ~0.3 are still amenable to library  
128 preparation, although potentially with reduced adapter ligation efficiency (see section SET-D in  
129 the supplementary online materials for a discussion of extract qPCR inhibition).

130 Mapped, *BLASTn* aligned, and LCA-assigned reads extracted with our modified Dabney  
131 protocol show an average 14.6-fold increase in bait on-target, map filtered reads over PowerSoil  
132 extractions, and a 22.6-fold increase in map-filtered reads over samples targeted with PCR  
133 metabarcoding (Table 1). This large fold increase in on-target molecules of total reads translates  
134 to a broader range of taxa identified, and a higher proportion of ecologically informative reads  
135 sequenced overall (Figures 4–7). Taxa with sufficiently high LCA-assigned read counts also  
136 show characteristic aDNA deamination patterns and fragment length distributions with  
137 *mapDamage* (Table E2; Figures E8–E12).

## 138 **Discussion**

139 Our novel 4°C centrifuge inhibitor removal procedure paired with Dabney et al. (2013)  
140 aDNA purifications and targeted enrichment consistently outperformed a sedaDNA commercial  
141 extraction kit across all extraction replicates, as well as outperforming a PCR metabarcoding  
142 approach. These results demonstrate the viability of targeted enrichment for taxonomically  
143 diverse environmental samples from open-air sites without the necessity of PCR metabarcoding  
144 and the associated compounding biases therein. These data also demonstrate the significantly  
145 improved efficiency of ecologically informative sequencing with RNA capture enrichment  
146 compared with a shotgun approach. Deep shotgun sequencing to library exhaustion would be  
147 ideal as it is the least taxonomically biasing approach. However, until data storage,

148 computational power, database completeness, and sequencing costs are improved, deep  
149 sequencing strategies are often unachievable for most users except for those with immense  
150 computational and sequencing resources.

### 151 *Overcoming enzymatic inhibitors*

152 Of interest for further research is the interaction between SDS and the 4°C spin for  
153 inhibitor precipitation (see section “SET-D. SDS and sarkosyl” in Appendix A). We suspect that  
154 the efficiency of inhibitor precipitation with this method could be further optimized as  
155 experiments suggest that the presence of SDS in the lysis buffer, which we hypothesize leads to  
156 the formation of micelles through constant agitation during the spin, significantly contributes to  
157 the precipitation of humics and other inhibitors at low temperatures. This technique is unlikely to  
158 be optimal for all forms of sedaDNA inhibition however, as it has been observed that identifying  
159 the specific inhibitory substances involved is critical to mitigating the compound specific  
160 mechanisms that affect enzymatic reactions (Opel et al., 2010). Further research, potentially with  
161 mass spectrometry, is needed to identify the inhibitor constituents of sedaDNA target samples in  
162 order to improve the inhibitor precipitation we observed while maximizing sedaDNA retention.

### 163 *SedaDNA authenticity*

164 Damage profiles for taxa with sufficiently high read counts ( $\geq 200$  reads at minimum map  
165 quality 30) consistently show characteristic aDNA deamination patterns and short fragment  
166 length distributions. We observed when mapping to the mitogenome that taxa with  $\leq 200$  reads  
167 typically have insufficient mapping coverage to confidently identify damage patterns, making it  
168 difficult to authenticate rare taxa with low read counts in this dataset. The inflated number of  
169 reads mapping to specific taxa compared with the read counts that were *bwa* mapped to our  
170 curated baits, *BLASTn* aligned, and *MEGAN* LCA-assigned are suggestive that our quality  
171 filtering steps are sufficiently conservative to dramatically reduce the noise characteristic of  
172 metagenomic datasets (Eisenhofer et al., 2019; Lu and Salzberg, 2018), but may also strip out  
173 some potentially informative (but less confidently assigned) reads. Our pre-*BLASTn* map-  
174 filtering approach allows for a much more streamlined analysis with confidently LCA-assigned  
175 taxa in the mapped dataset and less confident LCA-assigned taxa in the unmapped reads.

176 Extraction and library preparation blanks do not contain map-filtered reads (Table 1). The  
177 unmapped LCA-assigned reads for these blanks are predominantly adapter contaminated

178 sequences (Figure E13). None of the ecologically informative taxa identified in the metagenomic  
179 comparisons appear in the blanks, suggesting patterns observed in our sediment samples are  
180 authentic and not the result of contamination.

### 181 *Palaeoecology*

182 This study is intended as a proof of concept to demonstrate the viability of targeted  
183 enrichment for complex environmental datasets. Additional ongoing research is intended to  
184 utilize these methods and complementary palaeoecological techniques on Yukon lake sediment  
185 and permafrost cores from the Klondike Plateau (in addition to the metagenomic data from this  
186 paper) to temporally track ecological change during the Pleistocene/Holocene transition in  
187 Eastern Beringia. However, it is worth briefly contextualizing these broad taxonomic trends here  
188 for authenticity purposes. The Bear Creek (BC 4-2B, 30,000 cal-BP [D'Costa et al., 2011]) and  
189 older Lucky Lady II core sections (LLII 12-217-8, 15,865 cal-BP [Mahony, 2015]) both date to a  
190 period in which Eastern Beringia is thought to have been largely a herb tundra biome, dominated  
191 by exposed mineral surfaces, prostrate willows, grasses, forbs (nongraminoid herbs), and  
192 occupied by diverse and abundant megafauna (Dyke, 2005; Mahony, 2015). Our data reflects  
193 this environmental setting, particularly in the case of the Bear Creek core which has been  
194 demonstrated previously to exhibit remarkable preservation (D'Costa et al., 2011). We identified  
195 a similar series of mammal species compared to previous work on the same core by D'Costa et  
196 al. (2011), but with additional taxa (e.g. caribou, *Rangifer tarandus*) and more specific  
197 taxonomic assignments (e.g. potentially yak, *Bos mutus/grunniens*). Results from the younger  
198 Lucky Lady II core section (LLII 12-84-3, 13,205 cal-BP [Sadoway, 2014]) indicate an  
199 expansion of Western Beringian birch shrub tundra (Dyke, 2005), reflected by a decrease in  
200 grasses and a proportional increase in *Betula* and *Salix*. Analysis of the most recent core sample  
201 (MM12-118b, 9,685 cal-BP [Mahony, 2015]), suggests that there had been a shift in the  
202 forest/tundra ecotone in the Yukon before the development of the boreal (taiga) forest, which  
203 first established in southern Yukon by ~9,000 cal-BP (Dyke, 2005). Our data shows a  
204 proportional increase in conifers, particularly spruce (*Picea*).

205 The mammalian constituents also display a marked change, dwindling moving forward in  
206 time into the Holocene (Figures 4–6), but perhaps less sharply than commonly thought. For  
207 example, we recovered genetic evidence of both woolly mammoth (*Mammuthus primigenius*)  
208 and horse (*Equus sp.*) in the Upper Goldbottom core dated to ~9,685 cal-BP (Mahony, 2015).

209 Previous radiocarbon analyses appeared to indicate that horses disappeared from high-latitude  
210 northwestern North America relatively early, ca. 12,500 <sup>14</sup>C BP (“last appearance date” 13,125  
211 cal-BP, based on AMNH 134BX36 from Upper Cleary Creek [Guthrie, 2003]). This ~3,500 year  
212 difference implies the existence of a substantial *ghost range* (Haile et al., 2009) (i.e.,  
213 spatiotemporal range extending beyond its last appearance age as indicated by directly dated  
214 materials) that cannot (yet) be corroborated by the macrofossil record for *Equus*, but consistent  
215 with previous ancient eDNA results from central Alaska (Haile et al., 2009). However, in the  
216 absence of additional information, it is difficult to assess whether this signal may be considered  
217 chronostratigraphically reliable, or may have been affected by factors such as leaching, cryo- or  
218 bioturbation, or reworking (redeposition) (Arnold et al., 2011), altering the relative positions of  
219 sequenced sedaDNA organomineral complexes. In the case of the mammoth reads, after merging  
220 the sequenced data from the three Upper Goldbottom core (MM12-118b) extraction replicates,  
221 coverage was insufficient (low read count) to reliably assess characteristic aDNA damage  
222 patterns (Figure E12), although there is arguably some indication of damage with the merged  
223 *mapDamage* and FLD profile. We hope that with subsequent sedaDNA analyses from this region  
224 (with geographic targets selected to minimize the probability of containing stratigraphically  
225 allochthonous sedaDNA) we will be more able to closely evaluate the temporal authenticity of  
226 the megafaunal *ghost ranges* hinted at here with this dataset.

### 227 ***Limitations of comparison***

228 There are several caveats to keep in mind when assessing our comparison of protocols  
229 and the application PalaeoChip Arctic1.0. First, the lysing stage of our PowerSoil and Modified  
230 Dabney protocols were not equivalent in duration or reagents. We followed manufacturer  
231 specifications for PowerSoil, but the lysis stage of extraction with equivalent kits can be  
232 increased in duration and augmented with additional reagents to theoretically increase DNA  
233 yield (Niemeyer et al., 2017). Further, a recently released update to the PowerSoil kit, the  
234 DNeasy PowerSoil Pro, claims to have an 8-fold increase in DNA yield compared with  
235 comparative commercial kits (it is unclear what the fold increase over standard PowerSoil is with  
236 this updated kit). Our experiments with the PowerSoil inhibitor removal solution C3 found  
237 consistently low DNA retention compared with our longer duration 4°C spin as an inhibitor  
238 removal technique (see section SET-B in Appendix A). The PowerSoil inhibitor removal  
239 solution is effective at rapidly precipitating enzymatic inhibitors, but this study suggests that it is



240 overly aggressive and consistently precipitated viable sedaDNA in the process (see Figure S7 in  
241 Appendix A). We suspect that a longer lysis stage with PowerSoil would increase overall yields,  
242 but would not mitigate the substantial losses associated with overly aggressive humic  
243 precipitation when utilizing solution C3. We found that the 4°C spin is sufficiently effective at  
244 removing enzymatic inhibition to allow for successful adapter ligation, even if the extracts were  
245 not as inhibitor free as PowerSoil (Figure 3).

246         Second, metabarcoding is not directly equivalent to enrichment when comparing  
247 taxonomic coverage and LCA-assigned read counts. Metabarcoding is not limited by pre-  
248 synthesized baits, but rather by primer design (binding site conservation, database completeness,  
249 etc.). Mapping our data back to the baits does strip out potentially taxonomically informative hits  
250 *a priori*. To mitigate this, we have included a non-mapped comparative variant in Appendix A  
251 (see section SET-E). We observe that mapping to the curated baits (which have low complexity  
252 and non-diagnostic regions masked or removed) substantially reduces the number of low  
253 confidence (potential false-positive) spurious hits. Although, it is still worth looking through  
254 non-mapped data for positive, bait off-target assignments. This component highlights a limitation  
255 of enrichment overall, that one's taxonomic recovery is limited by the quality of the relevant  
256 bait-set, whereas PCR metabarcoded data is limited by biased PCR amplifications (low  
257 abundance taxa being swamped out by the over-amplification of high abundance or  
258 comparatively undamaged molecules) as well as primer sequence conservation (or lack thereof),  
259 and database completeness for design and alignment.

260         However, taxonomic alignments using amplicon sequence data may improve in the future  
261 as reference databases are updated. For example, *Sus scrofa* is not included in our targeted baits  
262 as members of this family (which includes peccaries or New World pigs) are not considered to  
263 have been present in the subarctic during the Pleistocene/Holocene transition (see Appendix B,  
264 note that flat-headed and collared peccary [*Pecari tajacu* and *Platygonus peccary* respectively]  
265 are included in the bait-set). However, Sadoway's (2014) metabarcoding approach was able to  
266 amplify suid reads in core BC 4-2B (Figure 7), which pass mapped-LCA filtering. Although  
267 some species of peccaries were able to live close to the ice margin in mid-continental North  
268 America during the late Pleistocene (Kurten and Anderson, 1980), there is no palaeontological  
269 evidence for their presence at that time in the Yukon (Stuart, 2015). In this case, one suspects  
270 that those metabarcoding reads are amplified contaminants. Regardless of specific instances like

271 this, it is reasonable to employ *a priori* limitations on a capture-based approach for filtering out  
272 taxa (either intentionally or unintentionally) prior to sequencing. The false-negative error  
273 potential of enrichment with sedaDNA can be mitigated with improved iterations of the bait-set  
274 (e.g. PalaeoChip Arctic2.0, Mediterranean1.5) as genetic reference databases are updated.

275 It should be noted that the PCR metabarcoding data utilized in this analysis was not  
276 extracted with our sedaDNA optimized strategy. It is likely that a metabarcoding approach may  
277 also be further improved by utilizing a 4°C inhibitor removal procedure to maximize sedaDNA  
278 retention. We acknowledge that this is an unfair limitation of our comparison, as the extraction  
279 methodology between our metabarcoding and enriched data are not equivalent. This topic is  
280 worthy of further research but lies outside the scope of our analysis here, which is intended to  
281 establish the viability of enrichment for sedaDNA contexts, and to report on a new inhibitor  
282 removal technique that may be further optimized. We intend to expand on PalaeoChip Arctic1.0  
283 with further target sequences for regionally specific vegetation, mammals, insects, fungi, and  
284 microbiota. PalaeoChip is also intended to be optimized for other non-arctic regions.

## 285 **Conclusion**

286 We believe the experiments outlined in this report through the development of a  
287 Holarctic PalaeoChip, in this case Arctic1.0, clearly demonstrate the utility of our novel inhibitor  
288 removal technique paired with high volume Dabney et al. (2013) purifications for overcoming  
289 enzymatic inhibitors, which likewise enables the viability of targeted enrichment for sedaDNA  
290 analyses. This approach can simultaneously capture complex environmental DNA without  
291 excessive PCR amplifications (and the associated costs of using high concentrations of  
292 polymerase to overcome co-eluted enzymatic inhibitors). By increasingly iterating on the  
293 taxonomic breadth of our complex environmental baits, and by further optimizing enrichment  
294 and sedaDNA extraction conditions, this technique can continue to improve the sequenced  
295 fraction of on-target molecules without deep shotgun sequencing, or potentially biased PCR  
296 amplifications. We believe our extraction method and enrichment strategy are of relevance not  
297 only for ancient DNA research, but also potentially for modern environmental DNA monitoring  
298 applications where the DNA copy number is high and targeted capture is of even more relevance  
299 for improving the analytic and cost efficiency of high-throughput metagenomic sequencing.

300

301 **Methods**

302 All supplementary procedures, tables, and figures reported here with an ‘S’ prefix (e.g.  
303 Table S1, Figure S1) are included in the supplementary online materials in Appendix A.

304 ***Lab setting***

305 Laboratory work was conducted in clean rooms at the McMaster Ancient DNA Centre,  
306 which are subdivided into dedicated facilities for sample preparation, stock solution setup, and  
307 DNA extraction through library preparation. Post-indexing and enrichment clean rooms are in a  
308 physically isolated facility, while high-copy PCR workspaces are in separate building with a one-  
309 way workflow progressing from low-copy to high-copy facilities. Each dedicated workspace is  
310 physically separated with air pressure gradients between rooms to reduce exogenous airborne  
311 contamination. Prior to all phases of laboratory work, dead air hoods and workspaces were  
312 cleaned using a 6% solution of sodium hypochlorite (commercial bleach) followed by a wash  
313 with Nanopure purified water (Barnstead) and 30 minutes of UV irradiation at  $>100 \text{ mJ/cm}^2$ .

314 **1. *Subsampling***

315 Metal sampling tools were cleaned with commercial bleach, rinsed with Nanopure water  
316 immediately thereafter (to reduce rusting), and heated overnight in an oven at  $\sim 130^\circ\text{C}$ . Once the  
317 tools had cooled, work surfaces were cleaned with bleach and Nanopure water and covered with  
318 sterile lab-grade tin foil. Sediment cores previously split into disks (D’Costa et al., 2011, p. SI.  
319 4–5; Sadoway, 2014, chap. 1) and stored at  $-20^\circ\text{C}$  had the upper  $\sim 1 \text{ mm}$  of external sediment  
320 chiselled off to create a fresh sampling area free of exogenous contaminants for a hollow  
321 cylindrical drill bit. The drill bit (diameter 0.5 cm) was immersed in liquid nitrogen prior to  
322 sampling and a drill press was used to repeatedly subsample the disk sections (D’Costa et al.,  
323 2011, fig. S3). Sediment was pushed out of the drill bit using a sterile nail and the bottom 1–2  
324 mm of sediment from the bit was removed before dislodging the remaining sample. This exterior  
325 core portion was carefully removed as it has a higher chance of containing sedaDNA from other  
326 stratigraphic contexts due to coring and core splitting. A bulk set of subsampled sediment from  
327 the same core disk was homogenized by stirring in a 50 mL falcon tube and stored at  $-20^\circ\text{C}$  for  
328 subsequent extractions. This process was repeated individually for each core.

329

330

## 331 **2. Physical disruption, chemical lysis, and extraction**

332 DNeasy PowerSoil DNA Extraction kit samples were extracted following manufacturer  
333 specifications; purified DNA was eluted twice with 25  $\mu$ L EBT buffer (10 mM Tris-Cl, 0.05%  
334 Tween-20). Samples extracted with the sedaDNA modified Dabney et al. (2013) procedure were  
335 processed as follows (see Figure 2):

### 336 *Lysis*

- 337 1) 500  $\mu$ L of a digestion solution (see Table S1) initially without proteinase K was  
338 added to PowerBead tubes (already containing garnet beads and 750  $\mu$ l 181 mM  
339 NaPO<sub>4</sub> and 121 mM guanidinium isothiocyanate).
- 340 2) 250 mg of homogenized sediment was added to each PowerBead tube.
- 341 3) PowerBead tubes were vortexed at high speed for 15 minutes, then centrifuged briefly  
342 to remove liquid from the lids.
- 343 4) 15.63  $\mu$ L of proteinase K (stock 20 mg/mL) was added to each tube to reach a  
344 proteinase K concentration of 0.25 mg/mL in the digestion and PowerBead solution  
345 (1.25 mL).
- 346 5) Tubes were finger vortexed to disrupt sediment and beads that had pelleted in step 3.
- 347 6) PowerBead tubes were securely fixed in a hybridization oven set to 35°C and rotated  
348 overnight for ~19 hours, ensuring that the digestion solution, sediment, and  
349 PowerBeads were moving with each oscillation.
- 350 7) PowerBead tubes were removed from the oven and centrifuged at 10,000 x g for 5  
351 minutes (the maximum speed recommended for PowerBead tubes). Supernatant was  
352 pipetted into a MAXYMum Recovery 2 mL tube and stored at -20°C.

### 353 *Purification*

- 354 8) Digestion supernatant was thawed, briefly centrifuged, pipetted into 16.25 mL (13  
355 volumes) of high-volume Dabney binding buffer (see Table S2) in a 50 mL falcon  
356 tube and mixed.
- 357 9) Falcon tubes were spun at 4500 rpm in a refrigerated centrifuge set to 4°C for 20  
358 hours overnight.
- 359 10) After centrifugation, falcon tubes were carefully removed and the supernatant was  
360 decanted, taking care to not disturb the darkly coloured pellet that had formed during  
361 the cold spin at the base of the tube.
- 362 11) The binding buffer was passed through a high-volume silica-column (High Pure  
363 Extender Assembly, Roche Diagnostics) and extraction proceeded as per Dabney et  
364 al. (2013).
- 365 12) Purified DNA was eluted off the silica columns twice with 25  $\mu$ L EBT.

366 Prior to all subsequent experiments, both the modified Dabney and PowerSoil extracts  
367 were centrifuged at 16,000 x g for 5 minutes to pellet remaining co-eluted inhibitors.

## 368 **3. Library preparation**

369 Doubled stranded libraries were prepared as described in Meyer and Kircher (2010) with  
370 modifications from Kircher et al. (2012) and a modified end-repair reaction to account for the

371 lack of uracil excision (Table S3). Samples were purified after blunt-end repair with a QIAquick  
372 PCR Purification Kit (QIAGEN) (to maximally retain small fragments) and after adapter ligation  
373 (Table S4) with a MinElute PCR Purification Kit (QIAGEN), both using manufacturers  
374 protocols. Library preparation master mix concentrations can be found in Tables S3-S6.

#### 375 **4. qPCR: Inhibition spike tests, total quantification, and indexing**

376 A positive control spike qPCR assay (Enk et al., 2016; King et al., 2009) was used to  
377 assess the relative impact of DNA independent inhibitors (co-eluted substances such as humics  
378 that inhibit enzyme function) on the enzymatic amplification efficiency of a spiked amplicon in  
379 the presence of template sedaDNA derived from variable lysing and extraction methods (Table  
380 S7). We suspected that enzymes in library preparation would be inhibited similarly to AmpliTaq  
381 Gold polymerase in qPCR. Shifts in the qPCR amplification slope of our spiked oligo with  
382 AmpliTaq Gold (due to co-eluted inhibitors in sedaDNA extracts) could then be quantified and  
383 used to infer the likelihood of failed adapter ligation due to enzymatic inhibitors (rather than a  
384 lack of sedaDNA). Admittedly, AmpliTaq Gold is not a 1:1 stand-in for inhibition sensitivity  
385 during blunt-end repair and adapter ligation, as AmpliTaq is among the most sensitive  
386 polymerases to inhibition induced reductions in amplification efficiency (Al-Soud and Radstrom,  
387 1998), and due to qPCR specific inhibition such as the reduction in fluorescence despite  
388 successful amplification (Sidstedt et al., 2015). Our experiments do suggest that these enzymes  
389 have a very roughly commensurate inhibition sensitivity, insofar as eluates completely inhibited  
390 during this spike test are unlikely to successfully undergo library adapter ligation.

391 To quantify the co-eluted inhibition affecting each spiked amplification, we compared the  
392 qPCR slope of an oligo-spiked sedaDNA extract (1  $\mu$ L of sample eluate spiked with 1  $\mu$ L of a  
393 49-bp oligo [1000 copies  $\{E^3\}$ ], see Table S7) with the qPCR slope of 1  $\mu$ L  $E^3$  oligo standard in  
394 1  $\mu$ L of EBT. Average  $C_q$  and max relative fluorescence units (RFU) for each PCR replicate  
395 were calculated, as was the hill slope of the amplification curve by fitting a variable-slope  
396 sigmoidal dose-response curve to the raw fluorescence data using GraphPad Prism v. 7.04 (based  
397 on King et al. [2009]). The  $E^3$  oligo-spiked averages ( $C_q$ , RFU, and sigmoidal hillslope) were  
398 divided by the corresponding  $E^3$  oligo standard amplification value, then averaged together to  
399 generate an ‘inhibition index’ per PCR replicate, which were averaged again across PCR  
400 replicates to determine an extract’s inhibition index, ranging from 0–1. In this case, 0 indicates a  
401 completely inhibited reaction (no measurable increase in RFU), and 1 indicates a completely

402 uninhibited reaction relative to the spiked E<sup>3</sup> oligo-standard (see Figure E14). Anything above  
403 0.9 (the bottom range for blanks and standards of differing starting quantities) is considered  
404 essentially uninhibited insofar as *Taq* polymerase inhibition is concerned.

405 Most total DNA quantifications in SET-A to SET-D<sub>2</sub> (detailed in the supplementary  
406 materials) used the short amplification primer sites on the library adapters and were compared  
407 against the same library prepared 49-bp oligo standard used in the spike tests (see Table S8).  
408 This assay was also modified in some instances to quantify the ‘endogenous’ chloroplast  
409 constituent of adapted molecules by pairing the *trnL* P6-loop forward primer-g (Taberlet et al.,  
410 2007) with the reverse P7R library adapter primer (IS8, see Table S9). Enk et al. (2013)  
411 demonstrated that a single-locus qPCR assay can be used to predict on-target ancient DNA high-  
412 throughput sequencing read counts. Previous analyses (D’Costa et al., 2011; Sadoway, 2014)  
413 indicated that ancient vegetation was the most consistently abundant fraction of the biomolecules  
414 in these cores, and as such could serve as a rough proxy for assessing aDNA retention for  
415 successfully library adapted molecules between various inhibitor removal strategies. For all  
416 qPCR results reported here, standard curve metrics are included in the associated captions. Ideal  
417 standard curve values are:  $R^2 = 1$ , slope = -3.3 (or between -3.1 and -3.5), efficiency = 90–105%.

418 The extraction triplicate with the highest DNA concentrations for each of the four cores  
419 and two extraction methods (as based on the short amplification qPCR) was indexed for shotgun  
420 sequencing (8 samples + 3 blanks). All extraction triplicates (24 samples + 3 blanks) were  
421 indexed separately thereafter for targeted enrichment.

## 422 **5. Enrichment: PalaeoChip, Arctic1.0**

423 The PalaeoChip, Arctic1.0 RNA hybridization bait-sets were designed to target whole  
424 mtDNA of extinct and extant Quaternary animals (focused primarily on megafauna; number of  
425 taxa  $\approx$  180), and high latitude plant cpDNA based on curated reference databases developed by  
426 Sønstebø et al. (2010), Soininen et al. (2015), and Willerslev et al. (2014), initially targeting *trnL*  
427 ( $n \approx$  1650 taxa) (see Appendix B for taxonomic list). This list was queried with the *NCBI Mass*  
428 *Sequence Downloader* software (Pina-Martins and Paulo, 2015) to recover additional nucleotide  
429 data from GenBank (Benson et al., 2018) for *trnL*, as well as adding targets for *matK* and *rbcL*.  
430 These three regions were selected as they are among the most sequenced and taxonomically  
431 informative portions of the chloroplast genome (Hollingsworth et al., 2011). Baits were designed

432 in collaboration with Arbor Biosciences to 80 bp with ~3x flexible tiling density, clustered with  
433 >96% identity and >83% overlap, and baits were removed with >25% soft-masking (to reduce  
434 low complexity baits with a high chance of being off-target in complex environmental samples).  
435 Bait sequences were queried with *BLASTn* against the NCBI database on a local computer cluster  
436 using a July 2018 database, then inspected in *MEGAN* (Huson et al., 2016, 2007). Baits with a  
437 mismatched taxonomic target and *BLASTn* alignment were queried again using a web-blast script  
438 (Camacho et al., 2009; NCBI Resource Coordinators, 2018) to determine if these mismatches  
439 were due to local database incongruities. Mismatches were again extracted with *MEGAN*,  
440 individually inspected, then removed from the bait-set if determined to be insufficiently specific.

441 Hybridization and bait mixes were prepared to the concentrations in Table S11. For each  
442 library, 7  $\mu$ L of template was combined with 2.95 $\mu$ L of Bloligos (blocking oligos which prevent  
443 the hybridization between library adapter sequences). The hybridization and bait mixes were  
444 combined and pre-warmed to 60°C, before being combined with the library-Bloligo mixture. The  
445 final reaction was incubated for 24 hours at 55°C for bait-library hybridization.

446 The next day, beads were dispensed (540  $\mu$ L total between two tubes), washed three  
447 times with 200  $\mu$ L of binding buffer for each tube, then suspension in 270  $\mu$ L of binding buffer  
448 per tube and aliquoted into PCR strips. Baits were captured using 20  $\mu$ L of the bead suspension  
449 per library, incubated at 55°C for 2.5 minutes, finger vortexed and spun down, and incubated for  
450 another 2.5 minutes. Beads were pelleted and the supernatant (the non-captured library fraction)  
451 was removed and stored at -20°C. The beads were resuspended in 180  $\mu$ L of 55°C Wash Buffer  
452 X and washed four times following the MYbaits V4 protocol. Beads were eluted in 15  $\mu$ L EBT,  
453 PCR reamplified (Table S6), then purified over MinElute following manufacturer's protocols in  
454 15  $\mu$ L EBT.

#### 455 **6. Post-indexing total quantification, pooling, size-selection, and sequencing**

456 Enriched and shotgun samples were quantified using the long-amplification total library  
457 qPCR assay (Table S10). Enriched and shotgun libraries were equal-molar pooled separately.  
458 The two pools were size-selected with gel excision following electrophoresis for molecules  
459 ranging from 150 bp to 600 bp. Gel plugs were purified using the QIAquick Gel Extraction Kit  
460 (QIAGEN), according to manufacturer's protocol, then sequenced on an Illumina HiSeq 1500

461 with a 2 x 90 bp paired-end protocol at the Farncombe Metagenomics Facility (McMaster  
462 University, ON).

### 463 **7. PCR Metabarcoding**

464 Sadoway (2014) previously worked with these and many other open-air Yukon  
465 permafrost core samples using a metabarcoding approach. These libraries had been extracted in  
466 duplicate with guanidinium protocols (Boom et al., 1990; D’Costa et al., 2011) from 250 mg of  
467 the same core sections, purified with silica (Höss and Pääbo, 1993), and eluted twice (Handt et  
468 al., 1996). Extensive inhibition at the time, as detected using similar qPCR spike tests developed  
469 by King et al. (2009), necessitated a tenfold extract dilution, which were then amplified in  
470 duplicate for each primer set, targeting: *rbcL* (CBOL Plant Working Group, 2009;  
471 Hollingsworth, 2011; Willerslev et al., 2003), *trnL* (Taberlet et al., 2007), *16S rRNA* (Höss et al.,  
472 1996), and *12S rRNA* (Kuch et al., 2002), each following cited PCR conditions. The locus  
473 *cytochrome b* (*cyt-b*) was also targeted using a set of degenerate primers designed with FastPCR  
474 (Kalendar et al., 2011; Sadoway, 2014). *Cyt-b* amplifications were found to be most efficient in  
475 20 µL reactions using AmpliTaq Gold (0.05U/µL), 1X PCR Buffer II, 2.5 mM MgCl<sub>2</sub>, 0.25 mM  
476 dNTPs, 0.5X Evagreen, 250 nM (forward/reverse primers) when cycled with a 3 minute  
477 denaturation at 95°C, 45 cycles of 95°C for 30 seconds, and 60°C for 30 seconds (Sadoway,  
478 2014). QPCR products were purified with 10K AcroPrep Pall plates (Pall Canada Direct Ltd.,  
479 Mississauga, ON, Canada) using a vacuum manifold. QPCR assays were used to pool each  
480 amplicon set in equimolar concentrations, which were library prepared and dual-index following  
481 the same Illumina protocols as described above (Kircher et al., 2012; Meyer and Kircher, 2010).  
482 Each sample extract had its own unique combination of forward and reverse indices, which were  
483 sequenced on a HiSeq 1500 Rapid Run (2 x 100bp, Illumina Cambridge Ltd, Essex, UK) at the  
484 Farncombe Metagenomics Facility (McMaster University, ON) to approximately 100,000 reads  
485 each. These PCR metabarcoded libraries were processed for this paper with an identical  
486 bioinformatic pipeline as described below.

### 487 **8. Bioinformatics**

488 Reads from all library sets (enriched, shotgunned, and PCR metabarcoded) were  
489 demultiplexed with *bcl2fastq* (v 1.8.4), converted to bam files with *fastq2bam*  
490 (<https://github.com/grenaud/BCL2BAM2FASTQ>), then trimmed and merged with using *leeHom*  
491 (Renaud et al., 2014) using ancient DNA specific parameters (--ancientdna). Reads were then



492 aligned to a concatenated reference of the animal and plant bait-set with *network-aware-BWA* (Li  
493 and Durbin, 2009) (<https://github.com/mpieva/network-aware-bwa>) with a maximum edit  
494 distance of 0.01 (-n 0.01), allowing for a maximum two gap openings (-o 2), and with seeding  
495 effectively disabled (-l 16500). Mapped reads that were either merged or unmerged but properly  
496 paired were extracted with *libbam* (<https://github.com/grenaud/libbam>), collapsed based on  
497 unique 5' and 3' positions with *biohazard* (<https://bitbucket.org/ustenzel/biohazard>), and  
498 restricted to a minimum length of 24bp. Both mapped and non-map filtered reads were string  
499 deduplicated using the *NGSXRremoveDuplicates* module of *NGSeXplore*  
500 (<https://github.com/ktmeaton/NGSeXplore>), then queried with *BLASTn* to return the top 100  
501 alignments (-num\_alignments 100 -max\_hsps 1) against a July 2018 version of the NCBI  
502 Nucleotide database on a local computer cluster. Non-map filtered libraries were treated  
503 identically, although only returned the top 10 alignments to mitigate unwieldy (>10 gb) file sizes.  
504 Sequencing summary counts are in Table 1.

505 Blast and fasta files for each sample (unmapped and mapped variants) were passed to  
506 *MEGAN* (Huson et al., 2016, 2007) using the following LCA parameters: min-score = 50  
507 (default), max expected (e-value) = 1.0E-5, minimum percent identity = 95% (allows 1 base  
508 mismatch at 24 bp, 2 at 50 bp, and 3 at 60 bp to account for cytosine deamination and other  
509 aDNA characteristic damage or sequencing errors), top percent consideration of hits based on  
510 bit-score = 15% (allows for slightly more conservative taxonomic assignments than the 10%  
511 default based on trial and error), minimum read support = 3 (number of unique reads aligning to  
512 an NCBI sequence for that taxon to be considered for LCA), minimum complexity = 0.3 (default  
513 minimum complexity filter), and utilizing the LCA weighted algorithm at 80% (two rounds of  
514 analysis that purportedly increases specificity but doubles run time over the native algorithm).  
515 Metagenomic profiles were compared in *MEGAN* using absolute and normalized read counts  
516 (normalized in *MEGAN* to the lowest read count, keeping at least 1 read per taxon). Libraries  
517 were not subsampled to an equal depth prior to processing; McMurdie and Holmes (2014) have  
518 demonstrated that this rarefying approach is the most ineffective means of accounting for  
519 unequally sequenced metagenomic data. However, in an attempt to fairly account for biases  
520 inherent in comparing capture enriched and amplicon data of unequal sequencing depths, we  
521 have included four versions of the bubble chart taxonomic comparisons per core: 1) absolute  
522 counts mapped filtered to our baits (in the main text) with total reads and proportional LCA-

523 assigned totals at the bottom of each column, 2) normalized counts mapped to baits, 3) absolute  
524 counts for all reads (not map filtered), and 4) normalized counts for all reads (not map filtered).  
525 The latter three comparisons are included in Appendix A.

526 To visualize the taxonomic variability between these replicates, comparative trees in  
527 *MEGAN* were uncollapsed to the ‘order’ rank (meaning that all lower taxonomic assignments  
528 within that ‘order’ are summed); animalia was then fully uncollapsed (as the read counts were  
529 more manageable compared with plant assignments). Viridiplantae clades were collapsed to  
530 higher ranks (higher than ‘order’) in some cases for summarized visualizations (otherwise there  
531 were too many leaves to display at once in a single figure, even if when only showing summaries  
532 by ‘order’). Thereafter, all leaves were selected and visualized with logarithmically scaled  
533 bubble charts; additional higher LCA-assigned animalia ranks were also selected where  
534 taxonomically informative (for example, reads that could only be conservatively LCA-assigned  
535 to Elephantidae or *Mammuthus sp.*, but which in this context likely represent hits to *Mammuthus*  
536 *primigenius* [woolly mammoth]). Low abundance (<3 reads), non-informative and non-target  
537 clades (e.g. bacteria, fungi, or LCA-assignments to high ranks) were excluded for visualization  
538 purposes. Reads within viridiplantae frequently hit low taxonomic ranks (family, genus, and  
539 occasionally species) but this resolution is not shown here to facilitate our goal of an inter-  
540 method comparison.

541 Taxa with high blast and LCA-assigned read-counts were also selected to evaluate  
542 damage patterns and fragment length distributions (FLD) (Table E2). Enriched libraries were  
543 mapped to reference genomes of either the LCA-assigned organism itself (e.g. *Mammuthus*  
544 *primigenius*) or a phylogenetically closely related organism (e.g. *Equus caballus*) if there was no  
545 species call or if a reliable reference genome does not yet exist. Mapping followed the  
546 aforementioned parameters and software, with an additional map-quality filter to  $\geq 30$  with  
547 *samtools* (<https://github.com/samtools/samtools>) and passed to *mapDamage* (Jónsson et al.,  
548 2013) (v 2.0.3, <https://ginolhac.github.io/mapDamage/>). Plant chloroplast DNA references were  
549 reduced to the target barcoding loci (*trnL*, *rbcL*, and *matK*), each separated by 100 Ns.  
550 Mitochondrial reference genomes were used for animal taxa of interest.

551

552 **Acknowledgements**

553 We wish to thank the Arctic Institute of North America, the Canadian Institutes of Health  
554 Research, the Garfield Weston Foundation, the Natural Sciences and Engineering Research  
555 Council of Canada, McMaster University, Polar Knowledge Canada (POLAR), and the Social  
556 Sciences and Humanities Research Council of Canada for each funding various components of  
557 this research.

558

559

560

561

## 562 **References**

- 563 Ahmed, E., Parducci, L., Unneberg, P., Ågren, R., Schenk, F., Rattray, J.E., Han, L.,  
564 Muschitiello, F., Pedersen, M.W., Smittenberg, R.H., Yamoah, K.A., Slotte, T., Wohlfarth,  
565 B., 2018. Archaeal community changes in Lateglacial lake sediments: Evidence from  
566 ancient DNA. *Quat. Sci. Rev.* 181, 19–29. doi:10.1016/j.quascirev.2017.11.037
- 567 Al-Soud, W.A., Radstrom, P., 1998. Capacity of nine thermostable DNA polymerases to mediate  
568 DNA amplification in the presence of PCR-inhibiting samples. *Appl. Environ. Microbiol.*  
569 64, 3748–3753.
- 570 Alsos, I.G., Sjo gren, P., Edwards, M.E., Landvik, J.Y., Gielly, L., Forwick, M., Coissac, E.,  
571 Brown, A.G., Jakobsen, L. V., Foreid, M.K., Pedersen, M.W., 2015. Sedimentary ancient  
572 DNA from Lake Skartjorna, Svalbard: Assessing the resilience of arctic flora to Holocene  
573 climate change. *The Holocene.* doi:10.1177/0959683615612563
- 574 Alvarez, A.J., Khanna, M., Toranzos, G.A., Stotzky, G., 1998. Amplification of DNA bound on  
575 clay minerals. *Mol. Ecol.* 7, 775–778.
- 576 Anderson-Carpenter, L.L., McLachlan, J.S., Jackson, S.T., Kuch, M., Lumibao, C.Y., Poinar,  
577 H.N., 2011. Ancient DNA from lake sediments: bridging the gap between paleoecology and  
578 genetics. *BMC Evol. Biol.* 11, 1–15. doi:10.1186/1471-2148-11-30
- 579 Arnold, L.J., Roberts, R.G., Macphee, R.D.E., Haile, J.S., Brock, F., M??ller, P., Froese, D.G.,  
580 Tikhonov, A.N., Chivas, A.R., Gilbert, M.T.P., Willerslev, E., 2011. Paper II - Dirt, dates  
581 and DNA: OSL and radiocarbon chronologies of perennially frozen sediments in Siberia,  
582 and their implications for sedimentary ancient DNA studies. *Boreas* 40, 417–445.  
583 doi:10.1111/j.1502-3885.2010.00181.x
- 584 Bellemain, E., Carlsen, T., Brochmann, C., Coissac, E., Taberlet, P., Kausserud, H., 2010. ITS as  
585 an environmental DNA barcode for fungi: an in silico approach reveals potential PCR  
586 biases. *BMC Microbiol.* 10, 189. doi:10.1186/1471-2180-10-189
- 587 Bellemain, E., Davey, M.L., Kausserud, H., Epp, L.S., Boessenkool, S., Coissac, E., Geml, J.,  
588 Edwards, M., Willerslev, E., Gussarova, G., Taberlet, P., Haile, J., Brochmann, C., 2013.  
589 Fungal palaeodiversity revealed using high-throughput metabarcoding of ancient DNA from  
590 arctic permafrost. *Environ. Microbiol.* 15, 1176–89. doi:10.1111/1462-2920.12020
- 591 Benson, D.A., Cavanaugh, M., Clark, K., Karsch-Mizrachi, I., Ostell, J., Pruitt, K.D., Sayers,  
592 E.W., 2018. GenBank. *Nucleic Acids Res.* 46, D41–D47. doi:10.1093/nar/gkx1094
- 593 Bezanilla, M., Manne, S., Laney, D.E., Lyubchenko, Y.L., Hansma, H.G., 1995. Adsorption of  
594 DNA to Mica, Silylated Mica, and Minerals: Characterization by Atomic Force  
595 Microscopy. *Langmuir* 11, 655–659. doi:10.1021/la00002a050
- 596 Blum, S.A.E., Lorenz, M.G., Wackernagel, W., 1997. Mechanism of retarded DNA degradation  
597 and prokaryotic origin of DNases in nonsterile soils. *Syst. Appl. Microbiol.* 20, 513–521.  
598 doi:10.1016/S0723-2020(97)80021-5
- 599 Boom, R., Sol, C.J., Salimans, M.M., Jansen, C.L., Wertheim-Van Dillen, P.M., van der  
600 Noordaa, J., 1990. Rapid and simple method for purification of nucleic acids.  
601 *J.Clin.Microbiol.* 28, 495–503. doi:10.1556/AMicr.58.2011.1.7
- 602 Cai, P., Huang, Q., Zhang, X., Chen, H., 2006. Adsorption of DNA on clay minerals and various  
603 colloidal particles from an Alfisol. *Soil Biol. Biochem.* 38, 471–476.  
604 doi:10.1016/j.soilbio.2005.05.019
- 605 Camacho, C., Coulouris, G., Avagyan, V., Ma, N., Papadopoulos, J., Bealer, K., Madden, T.L.,

- 606 2009. BLAST+: Architecture and applications. *BMC Bioinformatics* 10, 1–9.  
607 doi:10.1186/1471-2105-10-421
- 608 CBOL Plant Working Group, 2009. A DNA barcode for land plants. *Proc. Natl. Acad. Sci. U. S.*  
609 *A.* 106, 12794–7. doi:10.1073/pnas.0905845106
- 610 Clark, P. U., Mix, A. C., 2002. Ice sheets and sea level of the Last Glacial Maximum. *Quat. Sci.*  
611 *Rev.* 21, 1–7.
- 612 Clark, P.U., 2009. The Last Glacial Maximum. *Science* (80-. ). 325, 710–714.  
613 doi:10.1126/science.1172873
- 614 Cleaves, H.J., Crapster-Pregont, E., Jonsson, C.M., Jonsson, C.L., Sverjensky, D.A., Hazen,  
615 R.A., 2011. The adsorption of short single-stranded DNA oligomers to mineral surfaces.  
616 *Chemosphere* 83, 1560–1567. doi:10.1016/j.chemosphere.2011.01.023
- 617 Crecchio, C., Stotzky, G., 1998. Binding of DNA on humic acids: Effect of transformation of  
618 *Bacillus subtilis* and resistance to DNase. *Soil Biol. Biochem.* 30, 1061–1067.
- 619 D’Costa, V.M., King, C.E., Kalan, L., Morar, M., Sung, W.W.L., Schwarz, C., Froese, D.,  
620 Zazula, G., Calmels, F., Debruyne, R., Golding, G.B., Poinar, H.N., Wright, G.D., 2011.  
621 Antibiotic resistance is ancient. *Nature* 477, 457–461. doi:10.1038/nature10388
- 622 Dabney, J., Knapp, M., Glocke, I., Gansauge, M.-T., Weihmann, A., Nickel, B., Valdiosera, C.,  
623 Garcia, N., Paabo, S., Arsuaga, J.-L., Meyer, M., 2013. Complete mitochondrial genome  
624 sequence of a Middle Pleistocene cave bear reconstructed from ultrashort DNA fragments.  
625 *Proc. Natl. Acad. Sci.* 110, 15758–15763. doi:10.1073/pnas.1314445110
- 626 Dyke, A.S., 2005. Late Quaternary Vegetation History of Northern North America Based on  
627 Pollen, Macrofossil, and Faunal Remains. *Géographie Phys. Quat.* 59, 211.  
628 doi:10.7202/014755ar
- 629 Dyke, A.S., 2004. An outline of the deglaciation of North America with emphasis on central and  
630 northern Canada. *Dev. Quat. Sci.* 2, 373–424.
- 631 Ehlers, J., Gibbard, P.L., Hughes, P.D. (Eds.), 2011. *Quaternary Glaciations-Extent and*  
632 *Chronology: 1st Edition.* Elsevier.
- 633 Eisenhofer, R., Minich, J.J., Marotz, C., Cooper, A., Knight, R., Weyrich, L.S., 2019.  
634 Contamination in Low Microbial Biomass Microbiome Studies: Issues and  
635 Recommendations. *Trends Microbiol.* 27, 105–117. doi:10.1016/j.tim.2018.11.003
- 636 Enk, J., Devault, A., Widga, C., Saunders, J., Szpak, P., Southon, J., Rouillard, J.-M., Shapiro,  
637 B., Golding, G.B., Zazula, G., Froese, D., Fisher, D.C., Macphee, R.D.E., Poinar, H., 2016.  
638 *Mammuthus* population dynamics in Late Pleistocene North America: Divergence,  
639 Phylogeography and Introgression. *Front. Ecol. Evol.* 4, 1–13.  
640 doi:10.3389/fevo.2016.00042
- 641 Enk, J., Rouillard, J.M., Poinar, H., 2013. Quantitative PCR as a predictor of aligned ancient  
642 DNA read counts following targeted enrichment. *Biotechniques* 55, 300–309.  
643 doi:10.2144/000114114
- 644 Epp, L.S., Gussarova, G., Boessenkool, S., Olsen, J., Haile, J., Schröder-Nielsen, A., Ludikova,  
645 A., Hassel, K., Stenien, H.K., Funder, S., Willerslev, E., Kjær, K., Brochmann, C., 2015.  
646 Lake sediment multi-taxon DNA from North Greenland records early post-glacial  
647 appearance of vascular plants and accurately tracks environmental changes. *Quat. Sci. Rev.*  
648 117, 152–163. doi:10.1016/j.quascirev.2015.03.027
- 649 Gardner, C.M., Gunsch, C.K., 2017. Adsorption capacity of multiple DNA sources to clay

- 650 minerals and environmental soil matrices less than previously estimated. *Chemosphere* 175,  
651 45–51. doi:10.1016/j.chemosphere.2017.02.030
- 652 Garland, S., Baker, A., Phillott, A.D., Skerratt, L.F., 2010. BSA reduces inhibition in a  
653 TaqMan® assay for the detection of *Batrachochytrium dendrobatidis*. *Dis. Aquat. Organ.*  
654 92, 113–116. doi:10.3354/dao02053
- 655 Giguet-Covex, C., Pansu, J., Arnaud, F., Rey, P.-J., Griggo, C., Gielly, L., Domaizon, I.,  
656 Coissac, E., David, F., Choler, P., Poulenard, J., Taberlet, P., 2014. Long livestock farming  
657 history and human landscape shaping revealed by lake sediment DNA. *Nat. Commun.* 5,  
658 3211. doi:10.1038/ncomms4211
- 659 Goring, C.A.I., Bartholomew, W.V., 1952. Adsorption of mononucleotides, nucleic acids, and  
660 nucleoproteins by clays. *Soil Sci.* doi:10.1097/00010694-195208000-00005
- 661 Graham, R.W., Belmecheri, S., Choy, K., Culleton, B.J., Davies, L.J., Froese, D., Heintzman,  
662 P.D., Hritz, C., Kapp, J.D., Newsom, L.A., Rawcliffe, R., Saulnier-Talbot, É., Shapiro, B.,  
663 Wang, Y., Williams, J.W., Wooller, M.J., 2016. Timing and causes of mid-Holocene  
664 mammoth extinction on St. Paul Island, Alaska. *Proc. Natl. Acad. Sci.* 113, 9310–9314.  
665 doi:10.1073/pnas.1604903113
- 666 Greaves, M.P., Wilson, M.J., 1970. The degradation of nucleic acids and montmorillonite-  
667 nucleic-acid complexes by soil microorganisms. *Soil Biol. Biochem.* 2, 257–268.  
668 doi:10.1016/0038-0717(70)90032-5
- 669 Greaves, M.P., Wilson, M.J., 1969. The adsorption of nucleic acids by montmorillonite. *Soil*  
670 *Biol. Biochem.* 1, 317–323. doi:10.1016/0038-0717(69)90014-5
- 671 Guthrie, R.D., 2003. Rapid body size decline in Alaskan Pleistocene horses before extinction.  
672 *Nature* 426, 169–171.
- 673 Haile, J., Froese, D.G., Macphee, R.D.E., Roberts, R.G., Arnold, L.J., Reyes, A. V, Rasmussen,  
674 M., Nielsen, R., Brook, B.W., Robinson, S., Demuro, M., Gilbert, M.T.P., Munch, K.,  
675 Austin, J.J., Cooper, A., Barnes, I., Möller, P., Willerslev, E., 2009. Ancient DNA reveals  
676 late survival of mammoth and horse in interior Alaska. *Proc. Natl. Acad. Sci. U. S. A.* 106,  
677 22352–22357. doi:10.1073/pnas.0912510106
- 678 Handt, O., Krings, M., Ward, R.H., Pääbo, S., 1996. The retrieval of ancient human DNA  
679 sequences. *Am. J. Hum. Genet.* 59, 368–76.
- 680 Hollingsworth, P.M., 2011. Refining the DNA barcode for land plants. *Proc. Natl. Acad. Sci.*  
681 108, 19451–19452. doi:10.1073/pnas.1116812108
- 682 Hollingsworth, P.M., Graham, S.W., Little, D.P., 2011. Choosing and using a plant DNA  
683 barcode. *PLoS One* 6. doi:10.1371/journal.pone.0019254
- 684 Höss, M., Dilling, A., Currant, A., Pääbo, S., 1996. Molecular phylogeny of the extinct ground  
685 sloth *Myiodon darwini*. *Proc. Natl. Acad. Sci.* 93, 181–185. doi:10.1073/pnas.93.1.181
- 686 Höss, M., Pääbo, S., 1993. DNA extraction from Pleistocene bones by purification method.  
687 *Nucleic Acids Res.* 21, 3913–3914.
- 688 Huson, D.H., Auch, A.F., Qi, J., Schuster, S.C., 2007. MEGAN analysis of metagenomic data.  
689 *Genome Res.* 17, 377–386. doi:10.1101/gr.5969107
- 690 Huson, D.H., Beier, S., Flade, I., Górská, A., El-Hadidi, M., Mitra, S., Ruscheweyh, H.J., Tappu,  
691 R., 2016. MEGAN Community Edition - Interactive Exploration and Analysis of Large-  
692 Scale Microbiome Sequencing Data. *PLoS Comput. Biol.* 12.  
693 doi:10.1371/journal.pcbi.1004957

- 694 Jónsson, H., Ginolhac, A., Schubert, M., Johnson, P.L.F., Orlando, L., 2013. MapDamage2.0:  
695 Fast approximate Bayesian estimates of ancient DNA damage parameters. *Bioinformatics*  
696 29, 1682–1684. doi:10.1093/bioinformatics/btt193
- 697 Kalendar, R., Lee, D., Schulman, A.H., 2011. Java web tools for PCR, in silico PCR, and  
698 oligonucleotide assembly and analysis. *Genomics* 98, 137–144.  
699 doi:10.1016/j.ygeno.2011.04.009
- 700 Kanagawa, T., 2003. Bias and artifacts in multitemplate polymerase chain reactions (PCR). *J.*  
701 *Biosci. Bioeng.* 96, 317–323. doi:http://dx.doi.org/10.1016/S1389-1723(03)90130-7
- 702 King, C.E., Debruyne, R., Kuch, M., Schwarz, C., Poinar, H.N., 2009. A quantitative approach to  
703 detect and overcome PCR inhibition in ancient DNA extracts. *Biotechniques* 47, 941–949.  
704 doi:10.2144/000113244
- 705 Kircher, M., Sawyer, S., Meyer, M., 2012. Double indexing overcomes inaccuracies in multiplex  
706 sequencing on the Illumina platform. *Nucleic Acids Res.* 40, 1–8. doi:10.1093/nar/gkr771
- 707 Kreader, C.A., 1996. Relief of Amplification Inhibition in PCR with Bovine Serum Albumin or  
708 T4 Gene 32 Protein. *Appl. Environ. Microbiol.* 62, 1102–1106.
- 709 Krehenwinkel, H., Fong, M., Kennedy, S., Huang, E.G., Noriyuki, S., Cayetano, L., Gillespie,  
710 R., 2018. The effect of DNA degradation bias in passive sampling devices on  
711 metabarcoding studies of arthropod communities and their associated microbiota. *PLoS One*  
712 13, 1–14. doi:10.1371/journal.pone.0189188
- 713 Kuch, M., Rohland, N., Betancourt, J.L., Latorre, C., Stepan, S., Poinar, H.N., 2002. Molecular  
714 analysis of a 11 700-year-old rodent midden from the Atacama Desert, Chile. *Mol. Ecol.* 11,  
715 913–924. doi:10.1046/j.1365-294X.2002.01492.x
- 716 Kurten, B., Anderson, E., 1980. *Pleistocene Mammals of North America*. Columbia University  
717 Press.
- 718 Li, H., Durbin, R., 2009. Fast and accurate short read alignment with Burrows-Wheeler  
719 transform. *Bioinformatics* 25, 1754–60. doi:10.1093/bioinformatics/btp324
- 720 Lorenz, M.G., Wackernagel, W., 1987a. Adsorption of DNA to sand and variable degradation  
721 rates of adsorbed DNA. *Appl. Environ. Microbiol.* 53, 2948–2952.
- 722 Lorenz, M.G., Wackernagel, W., 1987b. Adsorption of DNA to sand and variable degradation of  
723 adsorbed DNA. *Appl. Environ. Microbiol.* 53, 2948–2952.
- 724 Lu, J., Salzberg, S.L., 2018. Removing Contaminants from Metagenomic Databases. *PLoS*  
725 *Comput. Biol.* 261859. doi:10.1101/261859
- 726 Mahony, M.E., 2015. 50,000 years of paleoenvironmental change recorded in meteoric waters  
727 and coeval paleoecological and cryostratigraphic indicators from the Klondike goldfields,  
728 Yukon, Canada. University of Alberta. doi:10.1145/3132847.3132886
- 729 McKee, A.M., Spear, S.F., Pierson, T.W., 2015. The effect of dilution and the use of a post-  
730 extraction nucleic acid purification column on the accuracy, precision, and inhibition of  
731 environmental DNA samples. *Biol. Conserv.* 183, 70–76. doi:10.1016/j.biocon.2014.11.031
- 732 McMurdie, P.J., Holmes, S., 2014. Waste not, want not: why rarefying microbiome data is  
733 inadmissible. *PLoS Comput. Biol.* 10, e1003531. doi:10.1371/journal.pcbi.1003531
- 734 Meyer, M., Kircher, M., 2010. Illumina sequencing library preparation for highly multiplexed  
735 target capture and sequencing. *Cold Spring Harb. Protoc.* 5. doi:10.1101/pdb.prot5448
- 736 Morrissey, E.M., McHugh, T.A., Preteska, L., Hayer, M., Dijkstra, P., Hungate, B.A., Schwartz,  
737 E., 2015. Dynamics of extracellular DNA decomposition and bacterial community

- 738 composition in soil. *Soil Biol. Biochem.* 86, 42–49. doi:10.1016/j.soilbio.2015.03.020
- 739 NCBI Resource Coordinators, 2018. Database resources of the National Center for  
740 Biotechnology Information. *Nucleic Acids Res.* 46, 8–13. doi:10.1093/nar/gkx985
- 741 Nichols, R. V., Vollmers, C., Newsom, L.A., Wang, Y., Heintzman, P.D., Leighton, M., Green,  
742 R.E., Shapiro, B., 2018. Minimizing polymerase biases in metabarcoding. *Mol. Ecol.*  
743 *Resour.* 18, 927–939. doi:10.1111/1755-0998.12895
- 744 Niemeyer, B., Epp, L.S., Stoof-Leichsenring, K.R., Pestryakova, L.A., Herzsuh, U., 2017. A  
745 comparison of sedimentary DNA and pollen from lake sediments in recording vegetation  
746 composition at the Siberian treeline. *Mol. Ecol. Resour.* 17, e46–e62. doi:10.1111/1755-  
747 0998.12689
- 748 Ogram, A., Sayler, G., Gustin, D., Lewis, R., 1988. DNA adsorption to soils and sediments.  
749 *Environ. Sci. Technol.* 22, 982–984.
- 750 Opel, K.L., Chung, D., McCord, B.R., 2010. A study of PCR inhibition mechanisms using real  
751 time PCR. *J. Forensic Sci.* 55, 25–33. doi:10.1111/j.1556-4029.2009.01245.x
- 752 Parducci, L., Bennett, K.D., Ficetola, G.F., Alsos, I.G., Suyama, Y., Wood, J.R., Pedersen,  
753 M.W., 2017. Ancient plant DNA in lake sediments. *New Phytol.* 214, 924–942.  
754 doi:10.1111/nph.14470
- 755 Pedersen, M.W., Ruter, A., Schweger, C., Friebe, H., Staff, R.A., Kjeldsen, K.K., Mendoza,  
756 M.L.Z., Beaudoin, A.B., Zutter, C., Larsen, N.K., Potter, B.A., Nielsen, R., Rainville, R.A.,  
757 Orlando, L., Meltzer, D.J., Kjær, K.H., Willerslev, E., 2016. Postglacial viability and  
758 colonization in North America’s ice-free corridor. *Nature* 537, 45–49.  
759 doi:10.1038/nature19085
- 760 Pina-Martins, F., Paulo, O.S., 2015. NCBI Mass Sequence Downloader—Large dataset  
761 downloading made easy. *SoftwareX* 5, 80–83. doi:10.1016/j.softx.2016.04.007
- 762 Rawlence, N.J., Lowe, D.J., Wood, J.R., Young, J.M., Churchman, G.J., Huang, Y.T., Cooper,  
763 A., 2014. Using palaeoenvironmental DNA to reconstruct past environments: Progress and  
764 prospects. *J. Quat. Sci.* 29, 610–626. doi:10.1002/jqs.2740
- 765 Renaud, G., Stenzel, U., Kelso, J., 2014. LeeHom: Adaptor trimming and merging for Illumina  
766 sequencing reads. *Nucleic Acids Res.* 42, e141. doi:10.1093/nar/gku699
- 767 Sadoway, T.R., 2014. A Metagenomic Analysis of Ancient Sedimentary DNA Across the  
768 Pleistocene-Holocene Transition. McMaster University.
- 769 Saeki, K., Sakai, M., Wada, S.I., 2010. DNA adsorption on synthetic and natural allophanes.  
770 *Appl. Clay Sci.* 50, 493–497. doi:10.1016/j.clay.2010.09.015
- 771 Sidstedt, M., Jansson, L., Nilsson, E., Noppa, L., Forsman, M., Rådström, P., Hedman, J., 2015.  
772 Humic substances cause fluorescence inhibition in real-time polymerase chain reaction.  
773 *Anal. Biochem.* 487, 30–37. doi:10.1016/j.ab.2015.07.002
- 774 Sjögren, P., Edwards, M.E., Gielly, L., Langdon, C.T., Croudace, I.W., Merkel, M.K.F.,  
775 Fonville, T., Alsos, I.G., 2016. Lake sedimentary DNA accurately records 20th Century  
776 introductions of exotic conifers in Scotland. *New Phytol.* 1–13. doi:10.1111/nph.14199
- 777 Slon, V., Hopfe, C., Weiß, C.L., Mafessoni, F., De La Rasilla, M., Lalueza-Fox, C., Rosas, A.,  
778 Soressi, M., Knul, M. V., Miller, R., Stewart, J.R., Derevianko, A.P., Jacobs, Z., Li, B.,  
779 Roberts, R.G., Shunkov, M. V., De Lumley, H., Perrenoud, C., Gušić, I., Kučan, Ž., Rudan,  
780 P., Aximu-Petri, A., Essel, E., Nagel, S., Nickel, B., Schmidt, A., Prüfer, K., Kelso, J.,  
781 Burbano, H.A., Pääbo, S., Meyer, M., 2017. Neandertal and Denisovan DNA from



- 782 Pleistocene sediments. *Science* (80-. ). 356, 605–608. doi:10.1126/science.aam9695
- 783 S e, M.J., Nejsum, P., Seersholm, F.V., Fredensborg, B.L., Habraken, R., Haase, K., Hald,  
784 M.M., Simonsen, R., H jlund, F., Blanke, L., Merkyte, I., Willerslev, E., Kapel, C.M.O.,  
785 2018. Ancient DNA from latrines in Northern Europe and the Middle East (500 BC–1700  
786 AD) reveals past parasites and diet. *PLoS One* 13, e0195481.  
787 doi:10.1371/journal.pone.0195481
- 788 Soininen, E.M., Gauthier, G., Bilodeau, F., Berteaux, D., Gielly, L., Taberlet, P., Gussarova, G.,  
789 Bellemain, E., Hassel, K., Stenoiien, H.K., Epp, L., Schroder-Nielsen, A., Brochmann, C.,  
790 Yoccoz, N.G., 2015. Highly overlapping winter diet in two sympatric lemming species  
791 revealed by DNA metabarcoding. *PLoS One* 10, 1–18. doi:10.1371/journal.pone.0115335
- 792 S nstebo, J.H., Gielly, L., Brysting, A.K., Elven, R., Edwards, M., Haile, J., Willerslev, E.,  
793 Coissac, E., Rioux, D., Sannier, J., Taberlet, P., Brochmann, C., Sonstebo, J.H., Gielly, L.,  
794 Brysting, A.K., Elven, R., Edwards, M., Haile, J., Willerslev, E., Coissac, E., Rioux, D.,  
795 Sannier, J., Taberlet, P., Brochmann, C., 2010. Using next-generation sequencing for  
796 molecular reconstruction of past Arctic vegetation and climate. *Mol. Ecol. Resour.* 10,  
797 1009–1018. doi:10.1111/j.1755-0998.2010.02855.x
- 798 Stuart, A.J., 2015. Late Quaternary megafaunal extinctions on the continents: a short review.  
799 *Geol. J.* 50, 414–433. doi:10.1002/gj
- 800 Sze, M.A., Schloss, P.D., 2019. The impact of DNA polymerase and number of rounds of  
801 amplification in PCR on 16S rRNA gene sequence data. *bioRxiv* 565598.  
802 doi:10.1101/565598
- 803 Taberlet, P., Bonin, A., Zinger, L., Coissac, E., 2018. *Environmental DNA: For Biodiversity*  
804 *Research and Monitoring*. Oxford University Press, Oxford, U.K.
- 805 Taberlet, P., Coissac, E., Pompanon, F., Gielly, L., Miquel, C., Valentini, A., Verinat, T.,  
806 Corthier, G., Brochmann, C., Willerslev, E., 2007. Power and limitations of the chloroplast  
807 trnL (UAA) intron for plant DNA barcoding. *Nucleic Acids Res.* 35, e14.  
808 doi:10.1093/nar/gkl938
- 809 Willerslev, E., Davison, J., Moora, M., Zobel, M., Coissac, E., Edwards, M.E., Lorenzen, E.D.,  
810 Vestergaard, M., Gussarova, G., Haile, J., Craine, J., Gielly, L., Boessenkool, S., Epp, L.S.,  
811 Pearman, P.B., Cheddadi, R., Murray, D., Brathen, K.A., Yoccoz, N., Binney, H., Cruaud,  
812 C., Wincker, P., Goslar, T., Alsos, I.G., Bellemain, E., Brysting, A.K., Elven, R., Sonstebo,  
813 J.H., Murton, J., Sher, A., Rasmussen, M., Ronn, R., Mourier, T., Cooper, A., Austin, J.,  
814 Moller, P., Froese, D., Zazula, G., Pompanon, F., Rioux, D., Niderkorn, V., Tikhonov, A.,  
815 Savvinov, G., Roberts, R.G., MacPhee, R.D.E., Gilbert, M.T.P., Kjaer, K.H., Orlando, L.,  
816 Brochmann, C., Taberlet, P., 2014. Fifty thousand years of Arctic vegetation and  
817 megafaunal diet. *Nature* 506, 47–51. doi:10.1038/nature12921
- 818 Willerslev, E., Hansen, A.J., Binladen, J., Brand, T.B., Gilbert, M.T.P., Shaprio, B., Bunce, M.,  
819 Wiuf, C., Gilichinsky, D.A., Cooper, A., 2003. Diverse Plant and Animal Genetic Records  
820 from Holocene and Pleistocene Sediments. *Science* (80-. ). 300, 791–795.  
821 doi:10.1126/science.1084114
- 822 Yoccoz, N.G., Br then, K.A., Gielly, L., Haile, J., Edwards, M.E., Goslar, T., Von Stedingk, H.,  
823 Brysting, A.K., COISSAC, E., Pompanon, F., S nstebo, J.H., Miquel, C., Valentini, A., De  
824 Bello, F., Chave, J., Thuiller, W., Wincker, P., Cruaud, C., Gavory, F., Rasmussen, M.,  
825 Gilbert, M.T.P., Orlando, L., Brochmann, C., Willerslev, E., Taberlet, P., 2012. DNA from  
826 soil mirrors plant taxonomic and growth form diversity. *Mol. Ecol.* 21, 3647–3655.

827           doi:10.1111/j.1365-294X.2012.05545.x

828

829

830

831

832 **Main Text Tables**

833

834 **Table 1** Sample IDs for experiment SET-E with read filtering summaries.

| Library       | Core Section  | Section Age      | Site             | SedaDNA Extraction  | Targeting Strategy | Total Reads | Mapped-to-Baits, Unique, & ≥ 24bp | BLASTn Hits LCA-Assigned | Assigned of Total | On-Target Fold Increase Over |                |
|---------------|---------------|------------------|------------------|---------------------|--------------------|-------------|-----------------------------------|--------------------------|-------------------|------------------------------|----------------|
|               |               |                  |                  |                     |                    |             |                                   |                          |                   | PowerSoil                    | Metabarcoding  |
| L-SET-256-En  |               |                  |                  |                     |                    | 6,292,874   | 14,408                            | 12,812                   | 0.20%             |                              |                |
| L-SET-257-En  | MM12-118b     | 9,685 cal-BP     | Upper Goldbottom | PowerSoil           | Enriched           | 675,550     | 4,615                             | 4,105                    | 0.61%             |                              |                |
| L-SET-258-En  |               |                  |                  |                     |                    | 820,382     | 4,885                             | 4,354                    | 0.53%             |                              |                |
| L-SET-259-En  |               |                  |                  |                     |                    | 515,685     | 2,916                             | 2,563                    | 0.50%             |                              |                |
| L-SET-260-En  | LLII 12-84-3  | 13,205 cal-BP    | Lucky Lady II    | PowerSoil           | Enriched           | 692,434     | 4,028                             | 3,470                    | 0.50%             |                              |                |
| L-SET-261-En  |               |                  |                  |                     |                    | 1,060,105   | 2,760                             | 2,368                    | 0.22%             |                              |                |
| L-SET-262-En  |               |                  |                  |                     |                    | 534,677     | 500                               | 452                      | 0.08%             |                              |                |
| L-SET-263-En  | LLII 12-217-8 | 15,865 cal-BP    | Lucky Lady II    | PowerSoil           | Enriched           | 873,741     | 348                               | 312                      | 0.04%             |                              |                |
| L-SET-264-En  |               |                  |                  |                     |                    | 418,730     | 717                               | 648                      | 0.15%             |                              |                |
| L-SET-265-En  |               |                  |                  |                     |                    | 682,544     | 1,788                             | 1,590                    | 0.23%             |                              |                |
| L-SET-266-En  | BC 4-2B       | 30,000 cal-BP    | Bear Creek       | PowerSoil           | Enriched           | 868,112     | 2,087                             | 1,770                    | 0.20%             |                              |                |
| L-SET-267-En  |               |                  |                  |                     |                    | 857,863     | 2,540                             | 2,249                    | 0.26%             |                              |                |
| L-SET-BK22-En |               | Extraction Blank |                  | PowerSoil           | Enriched           | 102,752     | 0                                 | 0                        | 0.00%             |                              |                |
| L-SET-268-En  |               |                  |                  |                     |                    | 1,704,149   | 140,049                           | 122,282                  | 7.18%             |                              |                |
| L-SET-269-En  | MM12-118b     | 9,685 cal-BP     | Upper Goldbottom | Modified Dabney     | Enriched           | 1,782,291   | 122,815                           | 104,760                  | 5.88%             | 15.7                         | 24.7           |
| L-SET-270-En  |               |                  |                  |                     |                    | 1,269,901   | 117,267                           | 102,542                  | 8.07%             |                              |                |
| L-SET-271-En  |               |                  |                  |                     |                    | 1,837,939   | 137,192                           | 119,031                  | 6.48%             |                              |                |
| L-SET-272-En  | LLII 12-84-3  | 13,205 cal-BP    | Lucky Lady II    | Modified Dabney     | Enriched           | 1,343,928   | 126,649                           | 110,609                  | 8.23%             | 19.3                         | 59.9           |
| L-SET-273-En  |               |                  |                  |                     |                    | 1,267,881   | 128,565                           | 112,855                  | 8.90%             |                              |                |
| L-SET-274-En  |               |                  |                  |                     |                    | 867,275     | 8,235                             | 6,600                    | 0.76%             |                              |                |
| L-SET-275-En  | LLII 12-217-8 | 15,865 cal-BP    | Lucky Lady II    | Modified Dabney     | Enriched           | 996,802     | 7,025                             | 5,614                    | 0.56%             | 7.7                          | 1.2            |
| L-SET-276-En  |               |                  |                  |                     |                    | 352,658     | 3,560                             | 2,802                    | 0.79%             |                              |                |
| L-SET-277-En  |               |                  |                  |                     |                    | 1,254,744   | 72,913                            | 62,778                   | 5.00%             |                              |                |
| L-SET-278-En  | BC 4-2B       | 30,000 cal-BP    | Bear Creek       | Modified Dabney     | Enriched           | 1,294,040   | 43,451                            | 37,878                   | 2.93%             | 15.8                         | 4.7            |
| L-SET-279-En  |               |                  |                  |                     |                    | 1,544,949   | 54,013                            | 47,613                   | 3.08%             |                              |                |
| L-SET-BK23-En |               | Extraction Blank |                  | Modified Dabney     | Enriched           | 1,186       | 2                                 | 0                        | 0.00%             | <b>Average</b>               | <b>Average</b> |
| L-SET-BK24-En |               | Library Blank    |                  |                     | Enriched           | 677         | 0                                 | 0                        | 0.00%             | <b>14.6</b>                  | <b>22.6</b>    |
| L-SET-256-SG  | MM12-118b     | 9,685 cal-BP     | Upper Goldbottom | PowerSoil           | Shotgun            | 1,717,174   | 55                                | 22                       | 0.00%             |                              |                |
| L-SET-259-SG  | LLII 12-84-3  | 13,205 cal-BP    | Lucky Lady II    | PowerSoil           | Shotgun            | 1,517,583   | 53                                | 17                       | 0.00%             |                              |                |
| L-SET-264-SG  | LLII 12-217-8 | 15,865 cal-BP    | Lucky Lady II    | PowerSoil           | Shotgun            | 1,497,940   | 19                                | 6                        | 0.00%             |                              |                |
| L-SET-265-SG  | BC 4-2B       | 30,000 cal-BP    | Bear Creek       | PowerSoil           | Shotgun            | 1,338,467   | 34                                | 5                        | 0.00%             |                              |                |
| L-SET-268-SG  | MM12-118b     | 9,685 cal-BP     | Upper Goldbottom | Modified Dabney     | Shotgun            | 2,202,687   | 544                               | 152                      | 0.01%             |                              |                |
| L-SET-272-SG  | LLII 12-84-3  | 13,205 cal-BP    | Lucky Lady II    | Modified Dabney     | Shotgun            | 2,122,805   | 573                               | 145                      | 0.01%             |                              |                |
| L-SET-274-SG  | LLII 12-217-8 | 15,865 cal-BP    | Lucky Lady II    | Modified Dabney     | Shotgun            | 1,992,150   | 283                               | 40                       | 0.00%             |                              |                |
| L-SET-279-SG  | BC 4-2B       | 30,000 cal-BP    | Bear Creek       | Modified Dabney     | Shotgun            | 8,593,408   | 816                               | 133                      | 0.00%             |                              |                |
| L-SET-BK22-SG |               | Extraction Blank |                  | PowerSoil           | Shotgun            | 2,756,360   | 3                                 | 0                        | 0.00%             |                              |                |
| L-SET-BK23-SG |               | Extraction Blank |                  | Modified Dabney     | Shotgun            | 1,748,595   | 3                                 | 0                        | 0.00%             |                              |                |
| L-SET-BK24-SG |               | Library Blank    |                  |                     | Shotgun            | 2,841,911   | 4                                 | 0                        | 0.00%             |                              |                |
| GB1           | MM12-118b     | 9,685 cal-BP     | Upper Goldbottom | D'Coستا et al. 2011 | Metabarcoding      | 109,233     | 320                               | 311                      | 0.28%             |                              |                |
| LL3           | LLII 12-84-3  | 13,205 cal-BP    | Lucky Lady II    | D'Coستا et al. 2011 | Metabarcoding      | 738,708     | 1047                              | 971                      | 0.13%             |                              |                |
| LL1           | LLII 12-217-8 | 15,865 cal-BP    | Lucky Lady II    | D'Coستا et al. 2011 | Metabarcoding      | 77,373      | 450                               | 448                      | 0.58%             |                              |                |
| BC            | BC 4-2B       | 30,000 cal-BP    | Bear Creek       | D'Coستا et al. 2011 | Metabarcoding      | 172,330     | 1359                              | 1348                     | 0.78%             |                              |                |

835 Core section ages as per D'Coستا et al. (2011), Mahony (2015), and Sadoway (2014). See Tables S17 and S18 in the SOM for a summary of major clade LCA-  
836 assignments.

837 **Main Text Figures**

838

839 **Figure 1** Permafrost coring sites in the Klondike of Yukon, Canada.

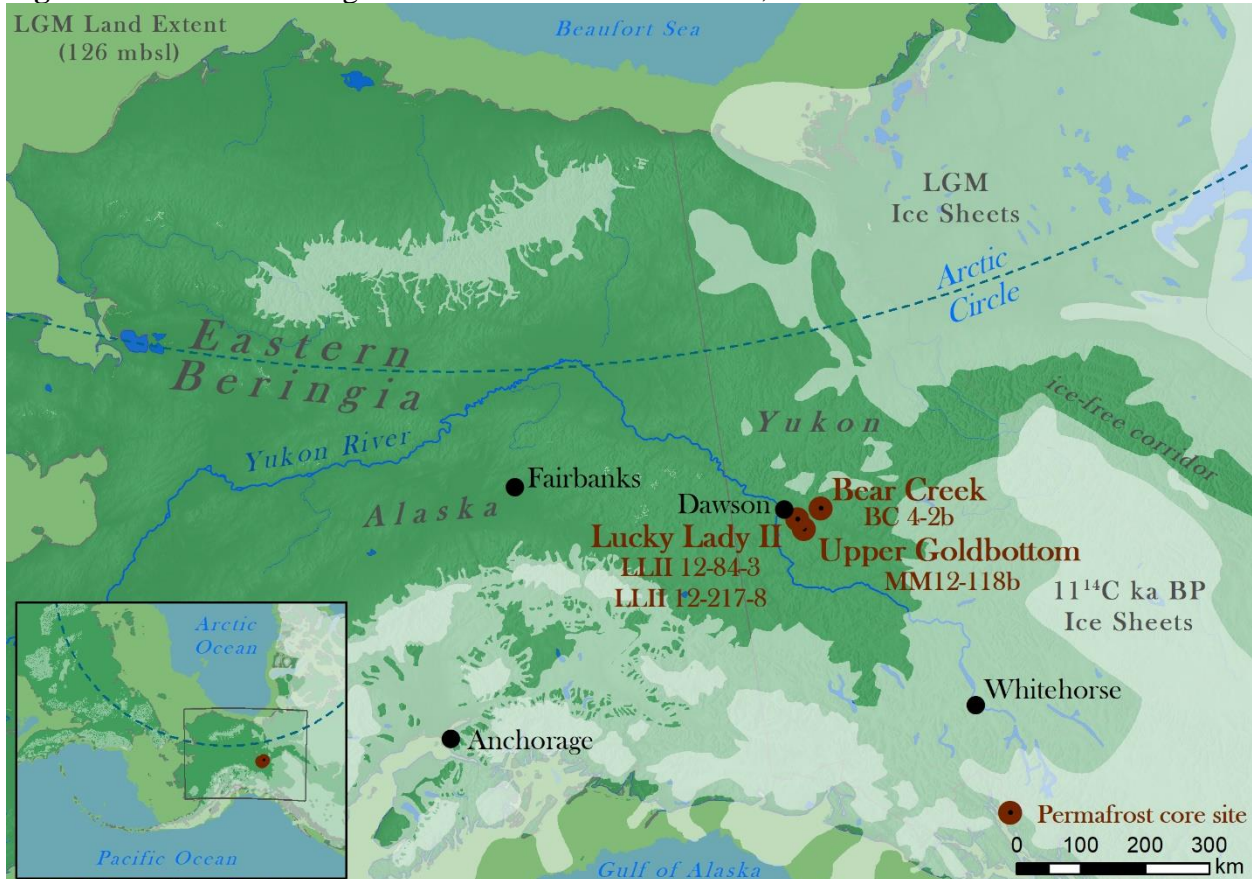

840

841 Ice sheet data from Dyke (2004) and Ehlers et al. (2011). Sea level at Last Glacial Maximum (LGM,  
842 26.5–19 ky BP) (Clark, 2009) set to 126 meters below sea level (msbl) based on midpoint between  
843 maximum and minimum eustatic sea level estimation models in Clark and Mix (2002).

844

845 **Figure 2** SedaDNA modified Dabney et al. (2013) extraction workflow.

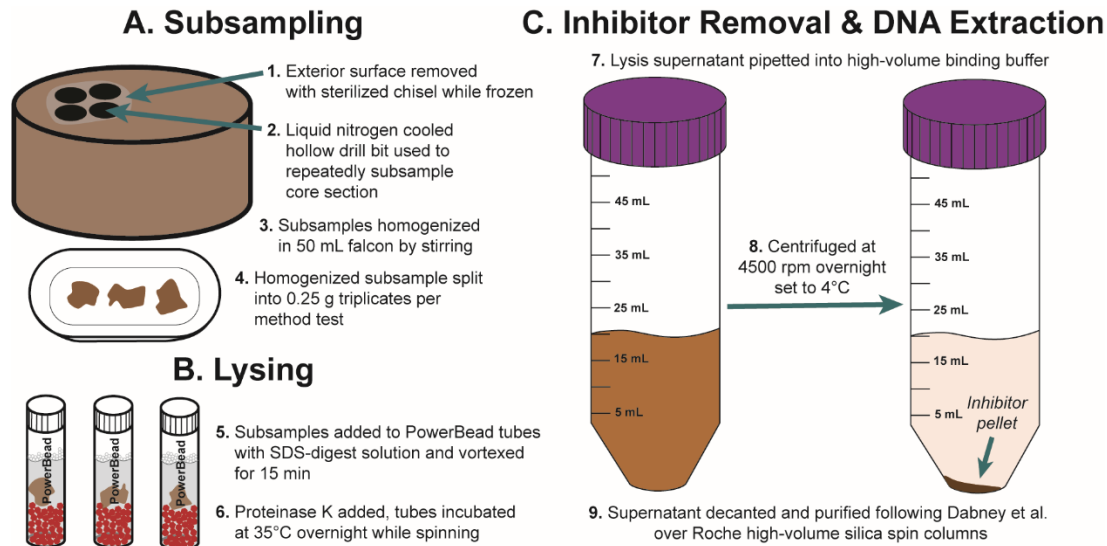

846

847 See the methods section for further details on extraction, double-stranded library preparation, capture  
848 enrichment, qPCR assays, and the bioinformatic workflow.

849

850

**Figure 3** Comparative qPCRs of library adapted DNA.

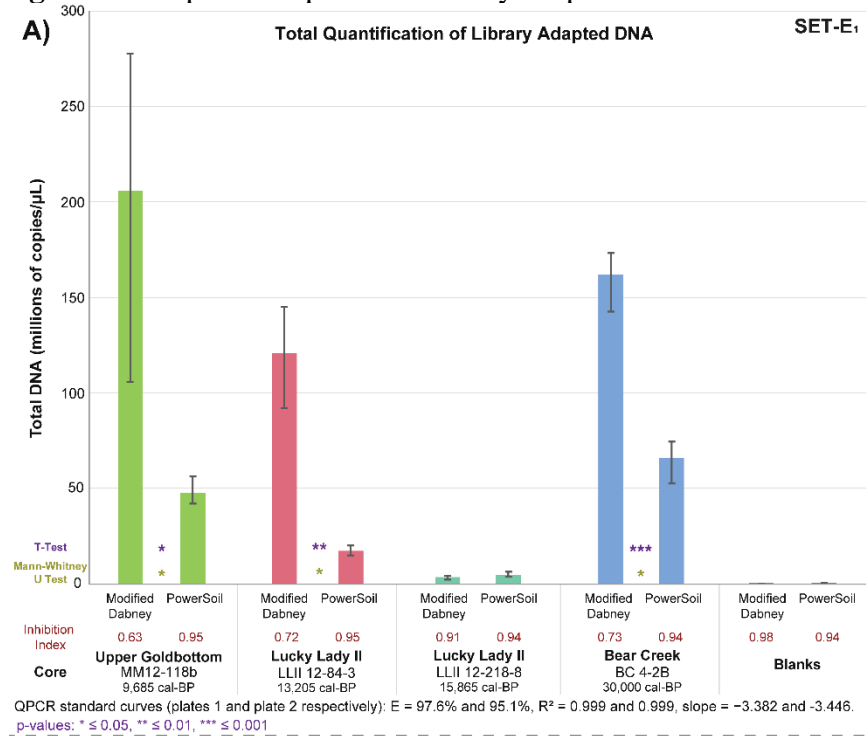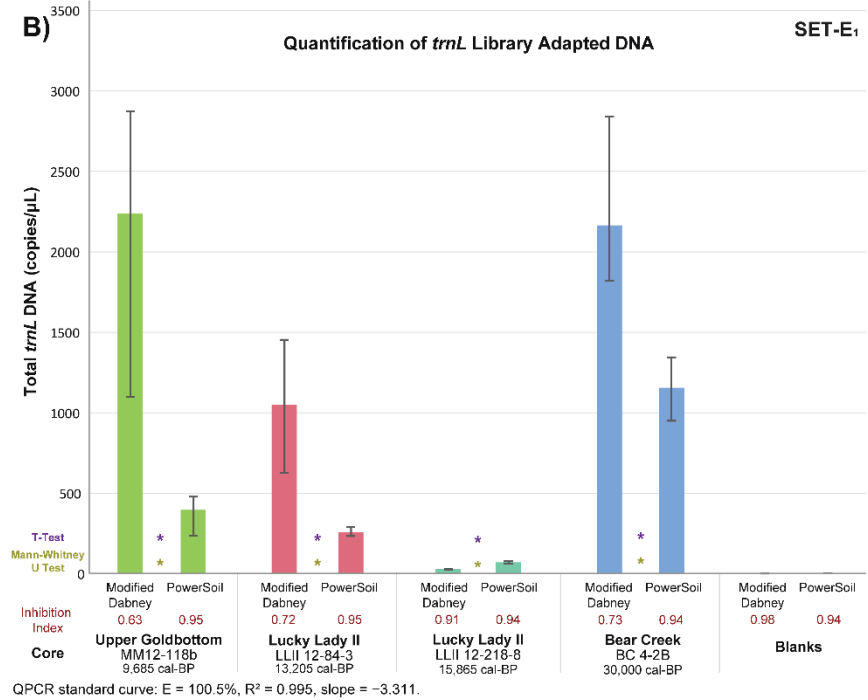

851  
852  
853  
854  
855  
856  
857  
858  
859

Each bar represents the average DNA copy number of the extraction-core triplicate, with the error bars indicating the maximum and minimum range. DNA concentration for each SET sample was averaged across PCR triplicates. Inhibition index refers to inhibition spike test (Table S7) on extracts prior to library prep. **A)** Total DNA quantification comparing both extraction methods by core; see Table S8 for PCR specifications. **B)** Total *trnL* adapted DNA; see Table S9 for PCR specifications. P-values calculated with both a two-sample t-test (parametric) and Mann-Whitney U test (non-parametric) (two-sided). The large range for modified Dabney extraction core MM12-118B is driven by a single lower copy number extraction replicate. Core LLII 12-217-8 consistently has low DNA recovery, but also a low co-elution of inhibition.

860 **Figure 4** Metagenomic comparison of Upper Goldbottom permafrost core MM12-118b, reads  
 861 mapped to baits, absolute counts (non-normalized).

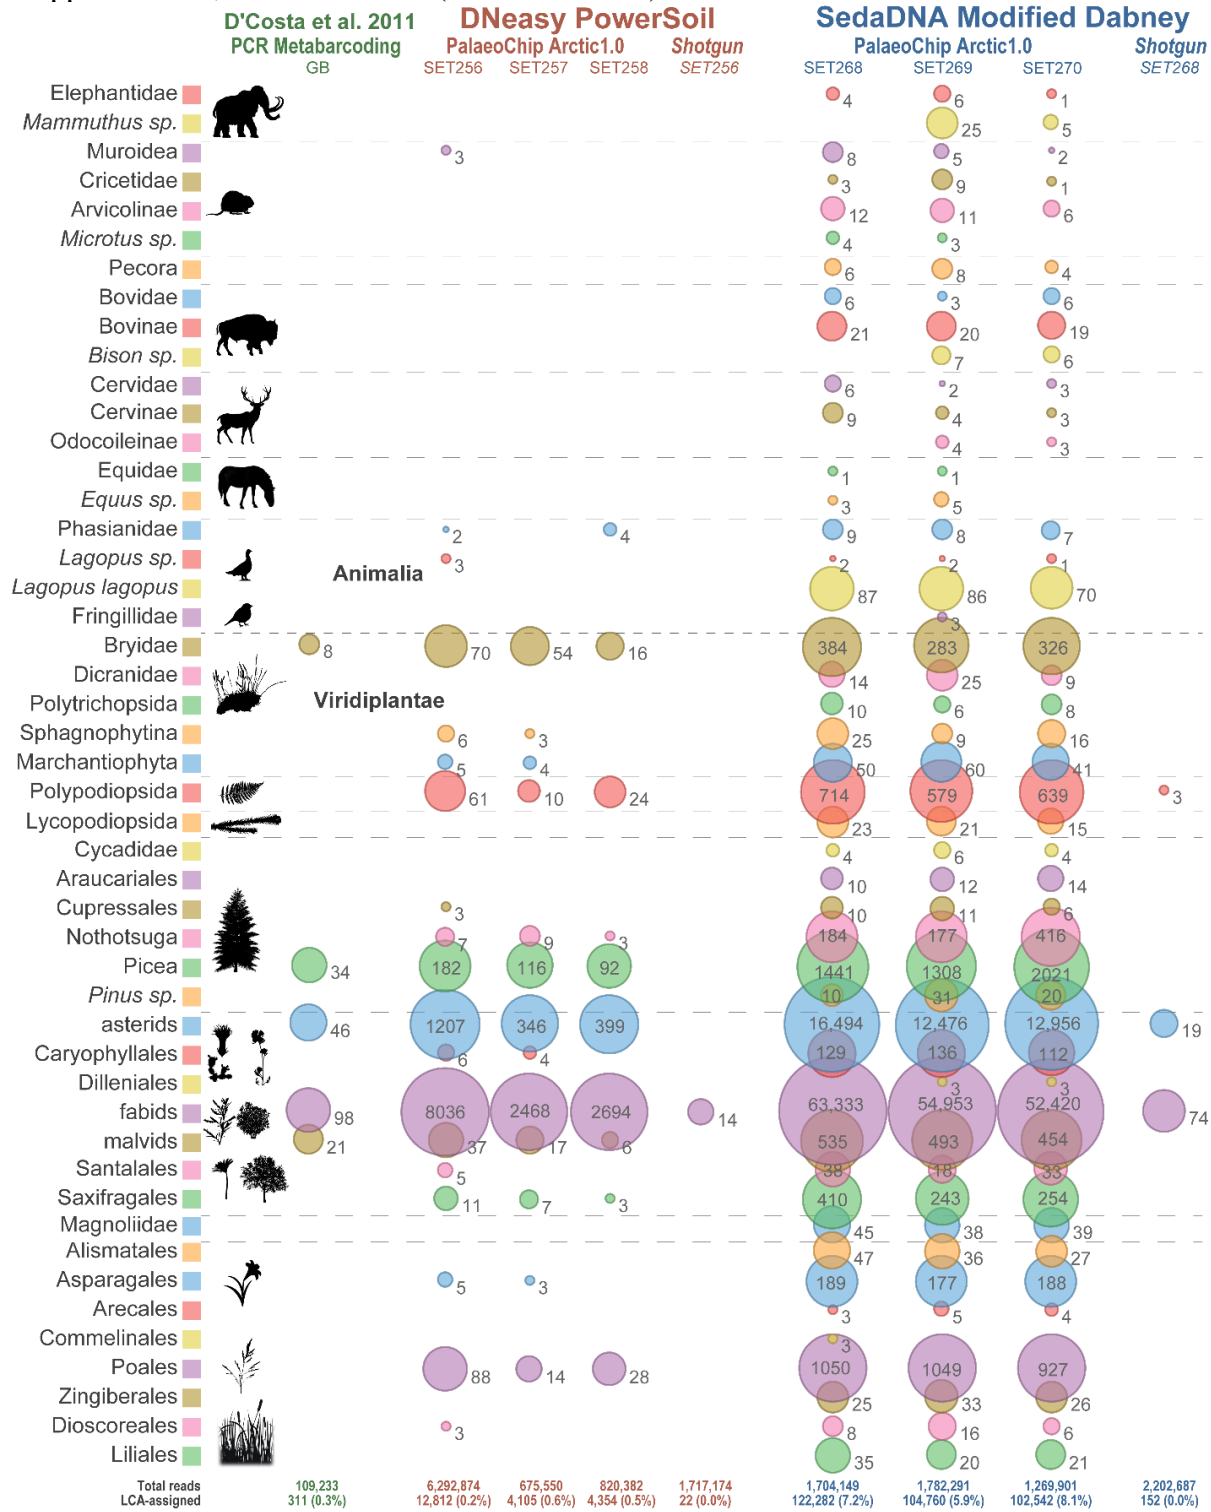

862  
 863 Core slice dated to 9,685 cal-BP (Mahony, 2015; Sadoway, 2014). Values indicate total reads assigned to  
 864 that taxon node for Animalia, and a clade summation of reads for Viridiplantae. See Table 1 for read  
 865 summaries.



866 **Figure 5** Metagenomic comparison of Lucky Lady II permafrost core LLII-12-84-3, reads  
 867 mapped to baits, absolute counts (non-normalized).

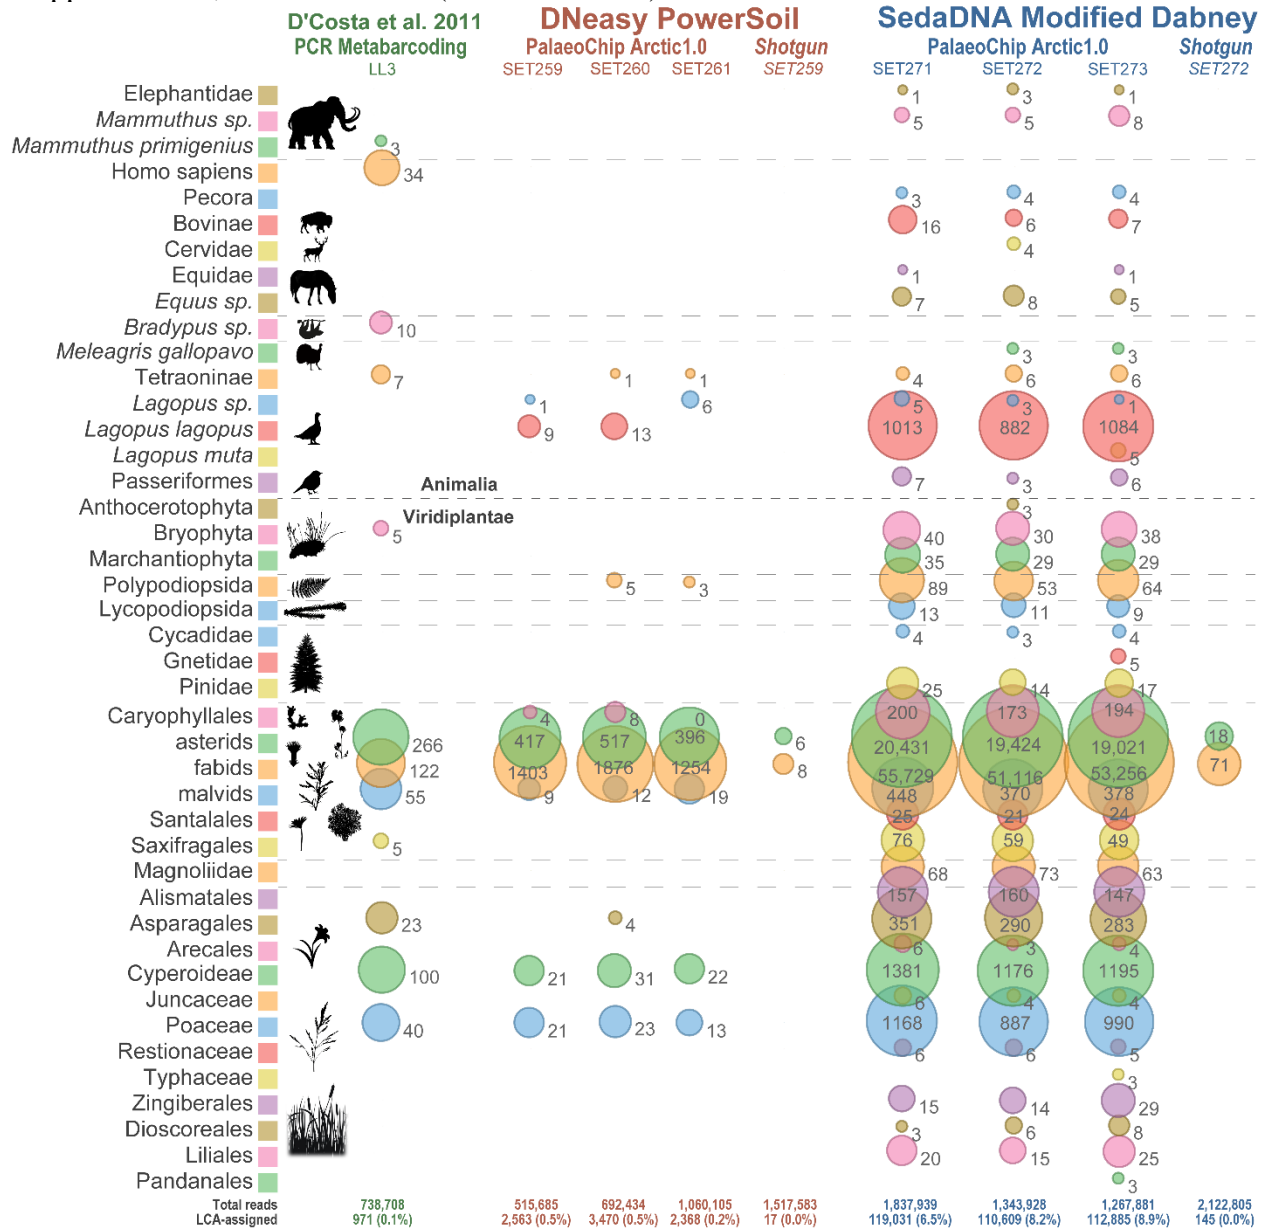

868 Core slice dated to 13,205 cal-BP (Sadway, 2014). Values indicate total reads assigned to that  
 869 taxon node for Animalia, and a clade summation of reads for Viridiplantae. See Table 1 for read  
 870 summaries.  
 871

872 **Figure 6** Metagenomic comparison of Lucky Lady II permafrost core LLII-12-217-8, reads  
 873 mapped to baits, absolute counts (non-normalized).

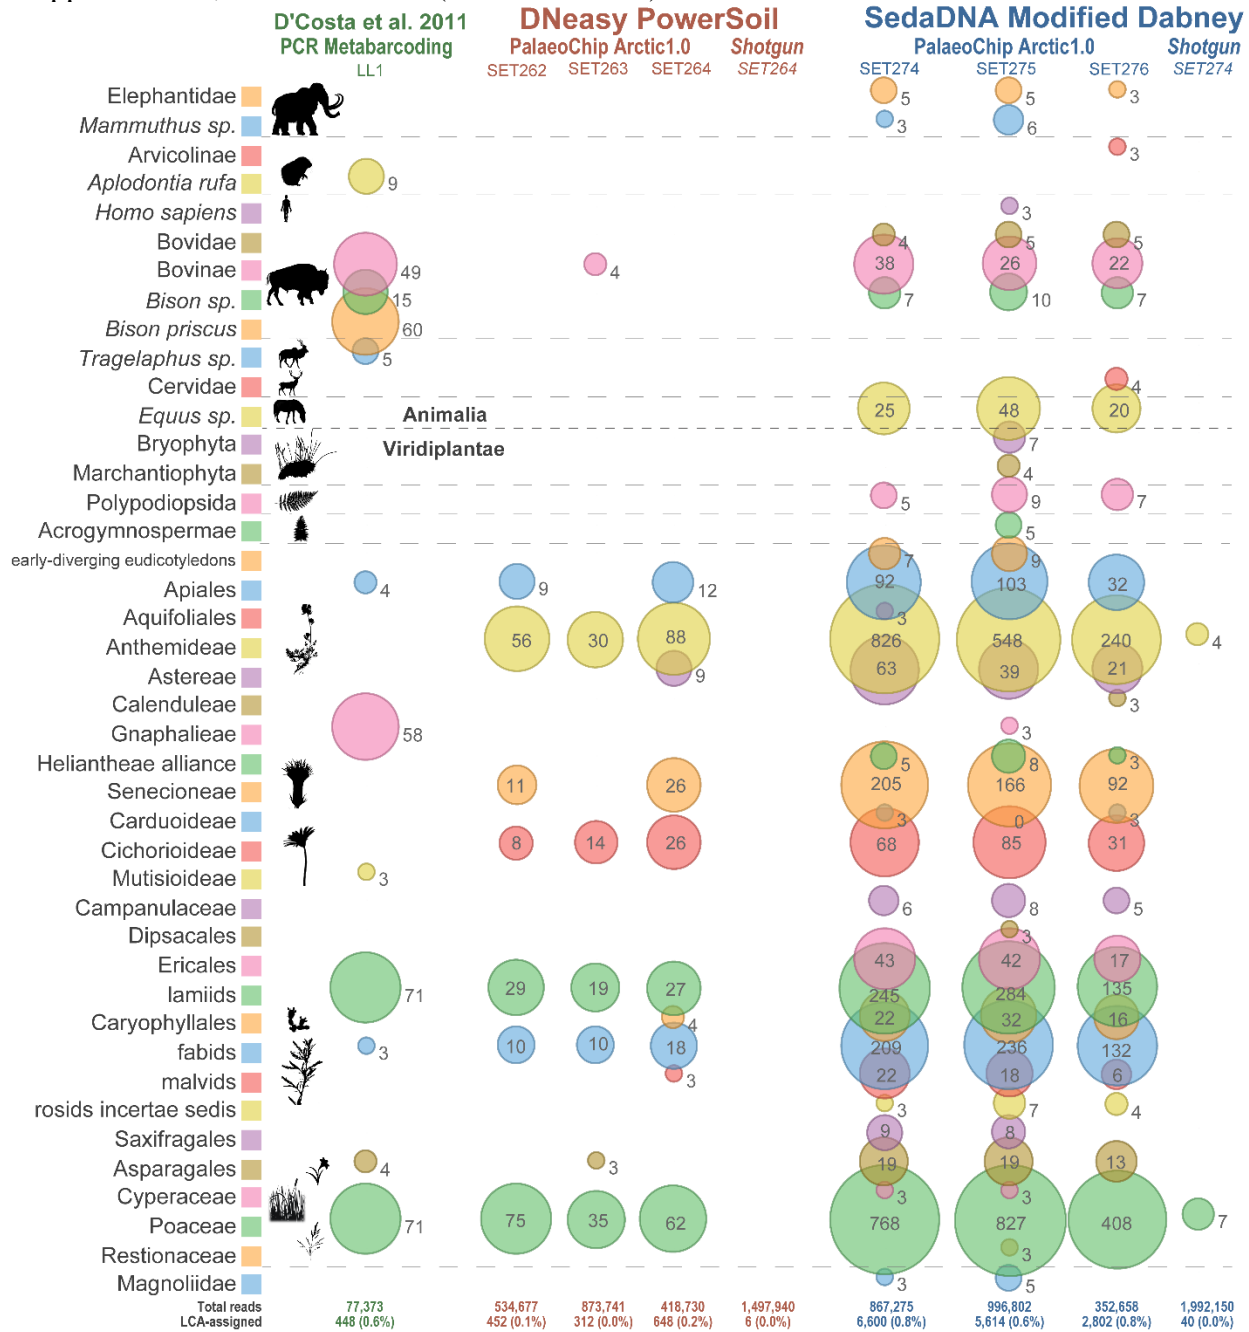

874 Core slice dated to 15,865 cal-BP (Sadway, 2014). Values indicate total reads assigned to that  
 875 taxon node for Animalia, and a clade summation of reads for Viridiplantae. See Table 1 for read  
 876 summaries.  
 877

878 **Figure 7** Metagenomic comparison of Bear Creek permafrost core BC 4-2B, reads mapped to  
 879 baits, absolute counts (non-normalized).

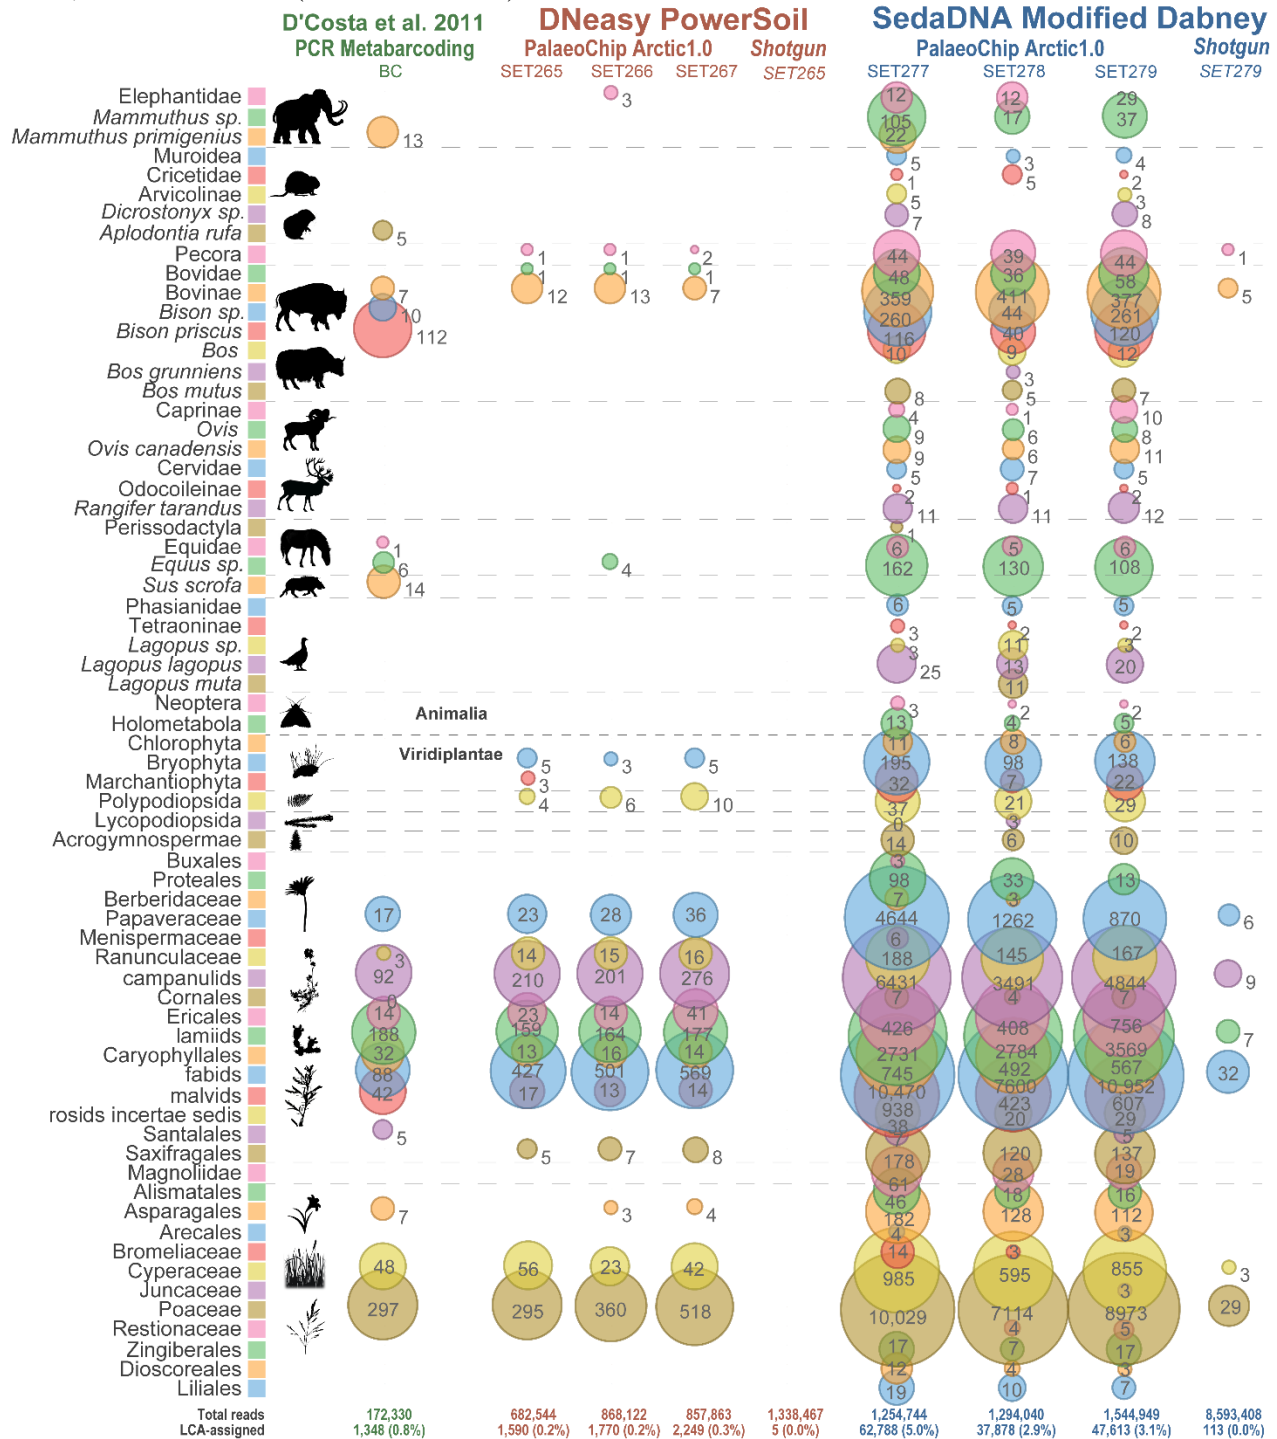

880 Core slice dated to ~30,000 cal-BP (D'Costa et al., 2011; Mahony, 2015; Sadoway, 2014).  
 881 Values indicate total reads assigned to that taxon node for Animalia, and a clad summation of  
 882 reads for Viridiplantae. See Table 1 for read summaries.  
 883  
 884

## 885 **Main Text Extended Tables**

886 **Table E2** Taxon specific mapping summary at a minimum length of 24 bp and mapping quality of 30.

| Library       | Core          | Extraction      | <i>Bison</i>   | <i>Equus</i>    | <i>Mammuthus primigenius</i> | <i>Lagopus</i> | <i>Picea</i>  | <i>Poa palustris</i> | <i>Salix</i>    | <i>Artemisia frigida</i> |
|---------------|---------------|-----------------|----------------|-----------------|------------------------------|----------------|---------------|----------------------|-----------------|--------------------------|
|               |               |                 | <i>priscus</i> | <i>caballus</i> |                              | <i>lagopus</i> | <i>glauca</i> |                      | <i>interior</i> |                          |
|               |               |                 | NC_027233      | NC_001640       | NC_007596                    | NC_035568      | NC_028594     | NC_027484            | NC_024681       | NC_020607                |
| L-SET-256-En  |               |                 | 6              | 0               | 3                            | 14             | 1,723         | 0                    | 37,569          | 3,645                    |
| L-SET-257-En  | MM12-118b     | PowerSoil       | 1              | 0               | 0                            | 7              | 1,279         | 298                  | 15,097          | 1,371                    |
| L-SET-258-En  |               |                 | 2              | 0               | 1                            | 24             | 1,212         | 263                  | 14,894          | 1,495                    |
| L-SET-259-En  |               |                 | 2              | 4               | 2                            | 110            | 130           | 218                  | 4,236           | 1,023                    |
| L-SET-260-En  | LLII 12-84-3  | PowerSoil       | 5              | 1               | 5                            | 74             | 196           | 294                  | 5,214           | 1,209                    |
| L-SET-261-En  |               |                 | 1              | 0               | 1                            | 63             | 136           | 196                  | 3,419           | 917                      |
| L-SET-262-En  |               |                 | 5              | 4               | 3                            | 3              | 17            | 227                  | 113             | 1,080                    |
| L-SET-263-En  | LLII 12-217-8 | PowerSoil       | 6              | 2               | 0                            | 1              | 20            | 106                  | 93              | 850                      |
| L-SET-264-En  |               |                 | 9              | 7               | 3                            | 1              | 33            | 171                  | 169             | 1,671                    |
| L-SET-265-En  |               |                 | 37             | 4               | 2                            | 7              | 52            | 920                  | 1,518           | 939                      |
| L-SET-266-En  | BC 4-2B       | PowerSoil       | 35             | 8               | 8                            | 10             | 95            | 953                  | 1,453           | 977                      |
| L-SET-267-En  |               |                 | 26             | 7               | 2                            | 13             | 79            | 1,477                | 1,864           | 1,149                    |
| L-SET-268-En  |               |                 | 103            | 47              | 44                           | 245            | 13,524        | 11,502               | 141,195         | 34,802                   |
| L-SET-269-En  | MM12-118b     | Modified Dabney | 106            | 45              | 83                           | 201            | 12,396        | 10,791               | 113,197         | 29,313                   |
| L-SET-270-En  |               |                 | 104            | 32              | 37                           | 178            | 14,575        | 10,480               | 112,797         | 30,262                   |
| L-SET-271-En  |               |                 | 74             | 49              | 59                           | 1,798          | 10,170        | 13,523               | 92,828          | 37,685                   |
| L-SET-272-En  | LLII 12-84-3  | Modified Dabney | 82             | 59              | 67                           | 1,611          | 9,921         | 12,811               | 85,995          | 36,168                   |
| L-SET-273-En  |               |                 | 78             | 51              | 61                           | 1,950          | 9,718         | 12,694               | 96,063          | 36,377                   |
| L-SET-274-En  |               |                 | 89             | 58              | 17                           | 21             | 533           | 1,551                | 1,731           | 6,462                    |
| L-SET-275-En  | LLII 12-217-8 | Modified Dabney | 80             | 81              | 31                           | 21             | 444           | 1,484                | 1,426           | 4,455                    |
| L-SET-276-En  |               |                 | 74             | 43              | 13                           | 14             | 231           | 727                  | 745             | 2,226                    |
| L-SET-277-En  |               |                 | 1,466          | 427             | 311                          | 127            | 4,907         | 20,006               | 30,198          | 26,042                   |
| L-SET-278-En  | BC 4-2B       | Modified Dabney | 1,034          | 338             | 131                          | 123            | 3,082         | 13,724               | 20,619          | 15,035                   |
| L-SET-279-En  |               |                 | 1,541          | 370             | 221                          | 113            | 3,770         | 16,781               | 26,821          | 18,734                   |
| L-SET-BK22-En | Ext. Blank    | PowerSoil       | 0              | 0               | 0                            | 0              | 0             | 0                    | 0               | 0                        |
| L-SET-BK23-En | Ext. Blank    | Modified Dabney | 0              | 0               | 0                            | 1              | 0             | 0                    | 0               | 0                        |
| L-SET-Bk24-En | Library Blank |                 | 0              | 0               | 0                            | 0              | 0             | 0                    | 0               | 0                        |

887 *MapDamage* profiles for highlighted cells (see Figures E8–E12).

888

889 **Main Text Extended Figures**

890

891 **Figure E8** *MapDamage* plots for *Bison priscus* and *Mammuthus primigenius*

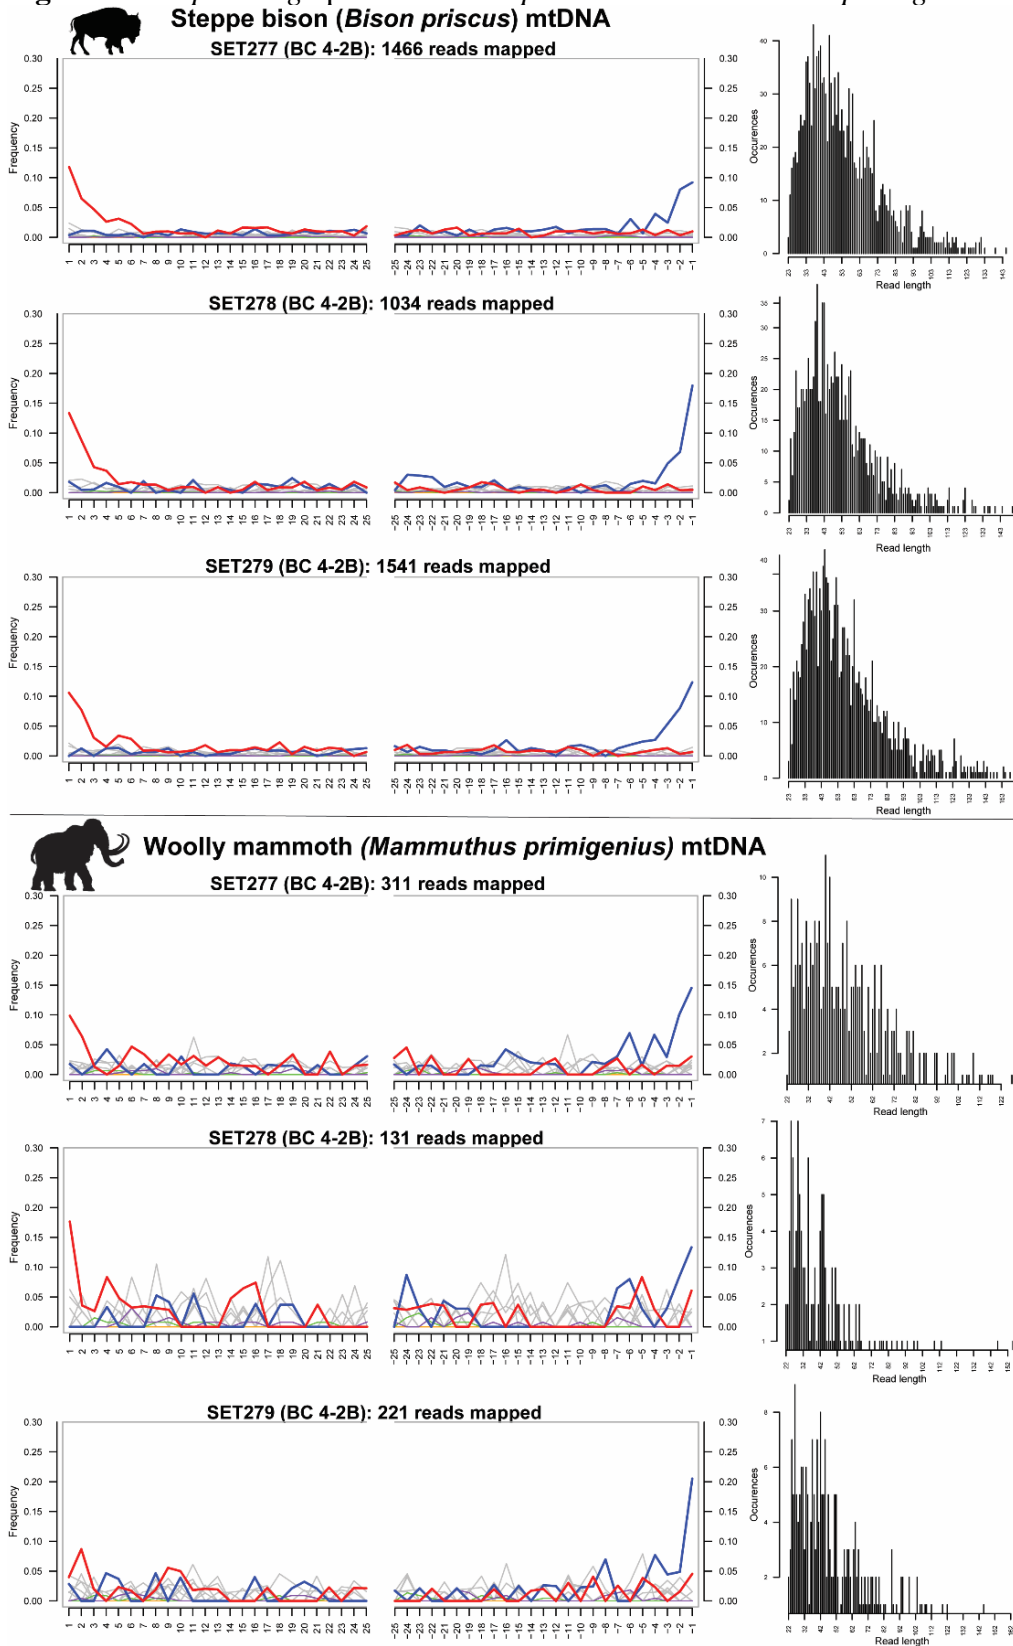

892  
893

Minimum length = 24 bp, minimum mapping quality = 30.

894 **Figure E9** *MapDamage* plots for *Lagopus lagopus* and *Equus caballus*  
 Willow ptarmigan (*Lagopus lagopus*) mtDNA

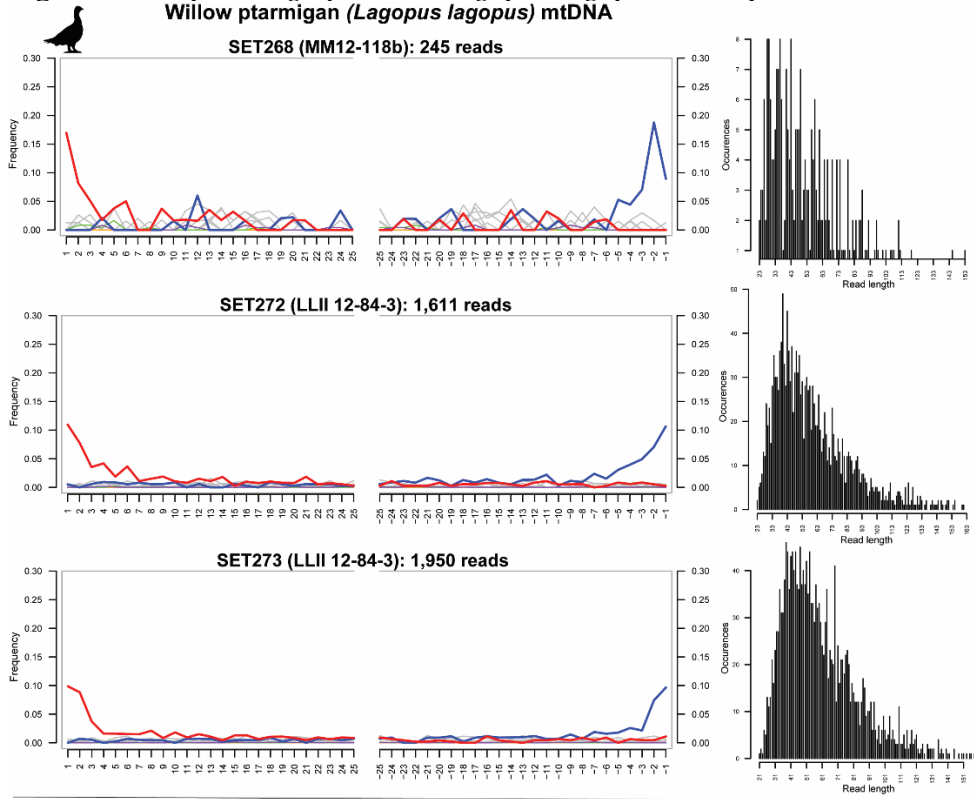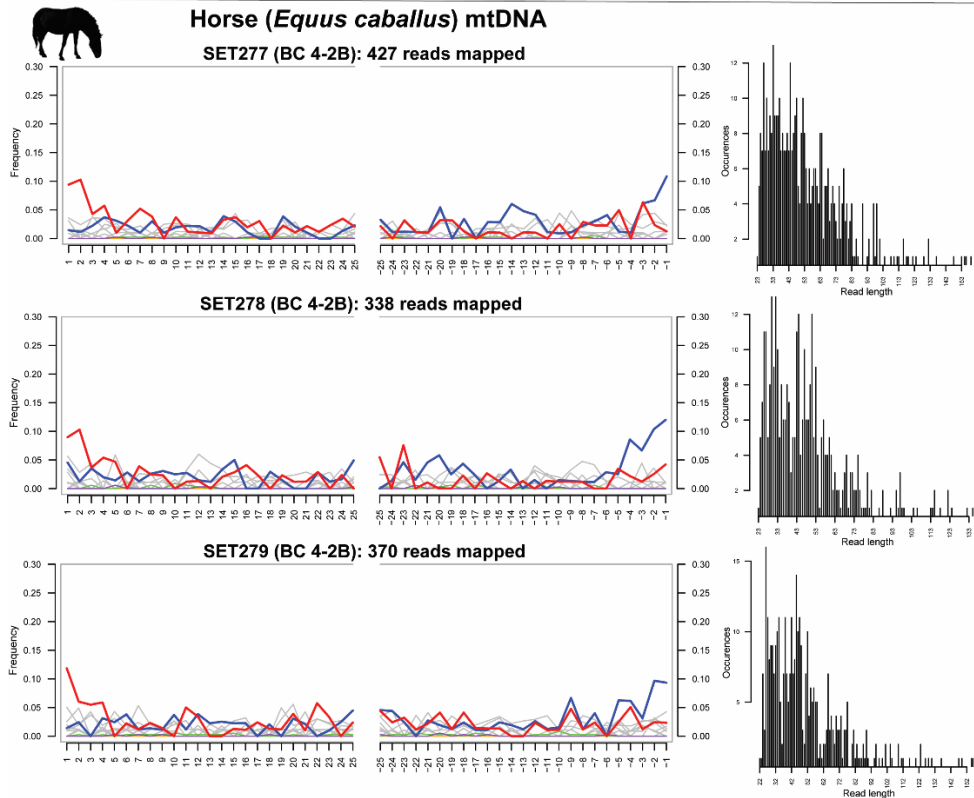

895  
 896 Minimum length = 24 bp, minimum mapping quality = 30.



897 **Figure E10** *MapDamage* plots for *Poa palustris* and *Artemisia frigida*

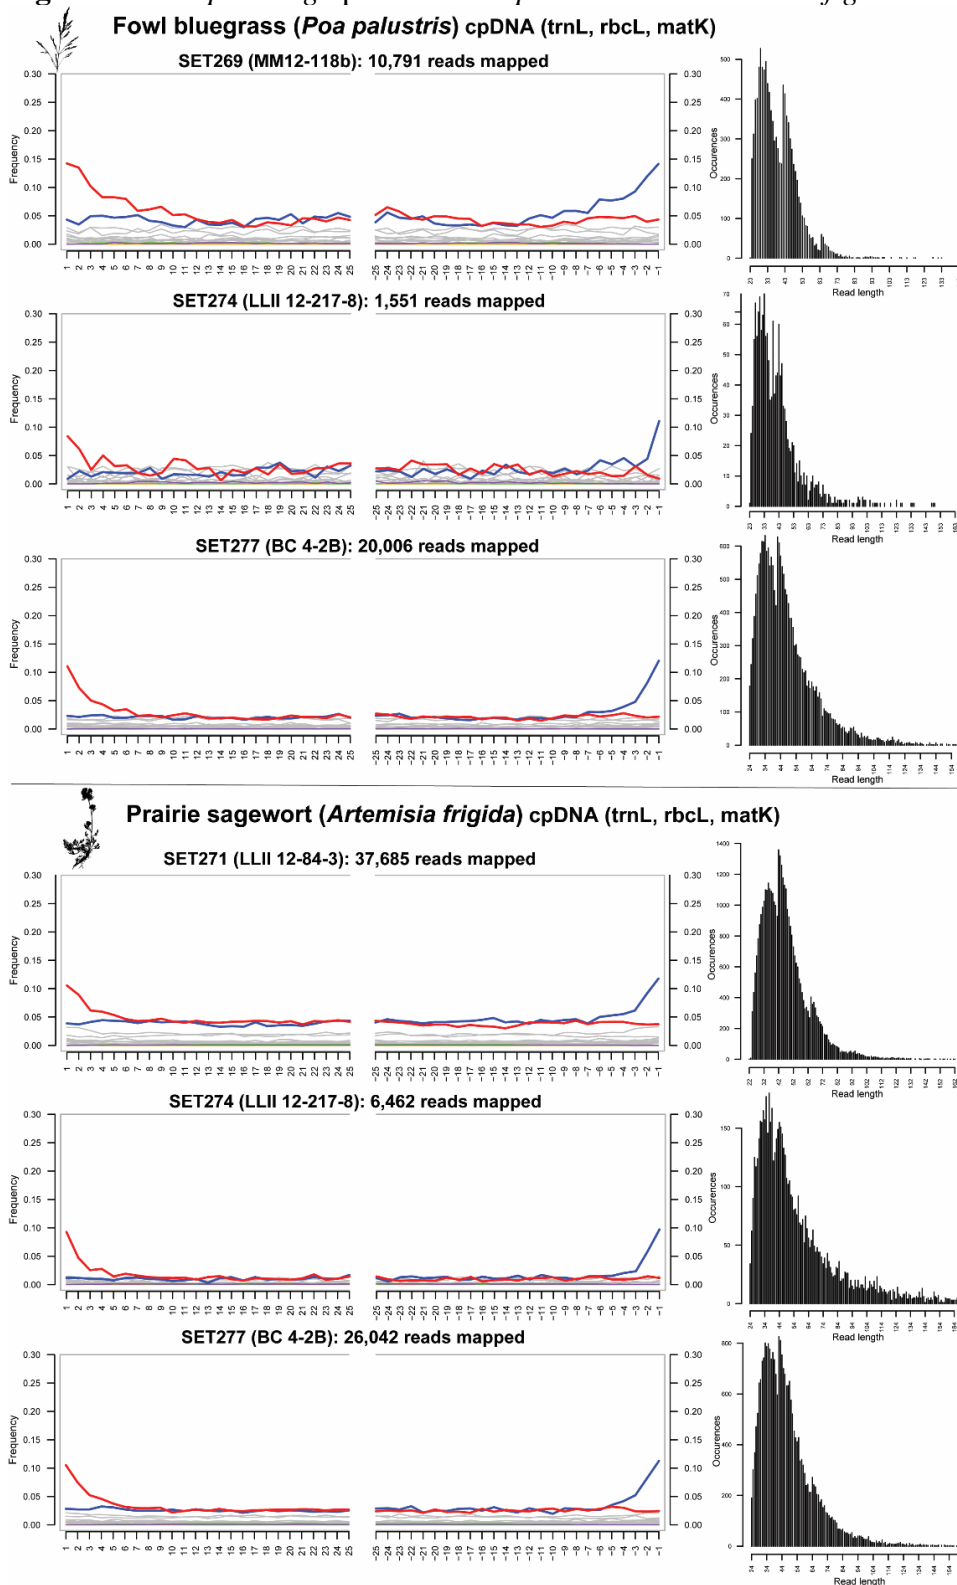

898  
899  
900  
901

Minimum length = 24 bp, minimum mapping quality = 30. We suspect that the bimodal distribution of the fragment length distributions is due to non-specific mapping of closely related taxa in conserved regions of these cpDNA barcoding loci.

902 **Figure E11** *MapDamage* plots for *Salix interior* and *Picea glauca*

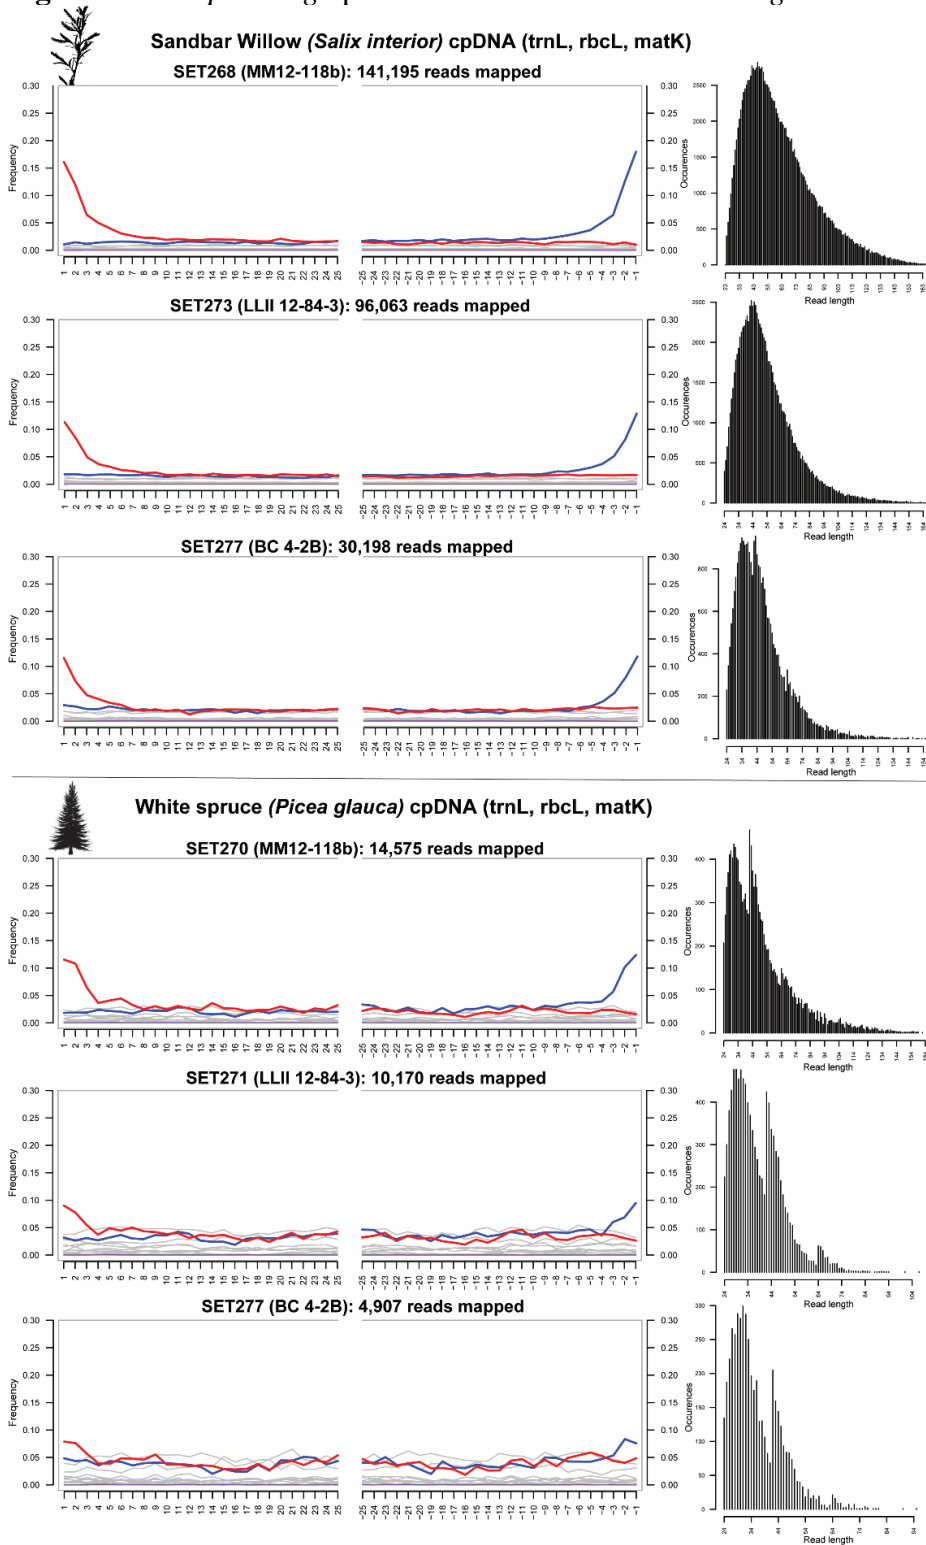

903  
904  
905  
906

Minimum length = 24 bp, minimum mapping quality = 30. We suspect that the bimodal distribution of the fragment length distributions is due to non-specific mapping of closely related taxa in conserved regions of these cpDNA barcoding loci.

907 **Figure E12** *MapDamage* MM12-118b merged replicates plot for *Mammuthus primigenius*.

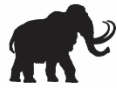

**Woolly mammoth (*Mammuthus primigenius*) mtDNA**

SET268–270 merged (MM12-118b): 164 reads mapped

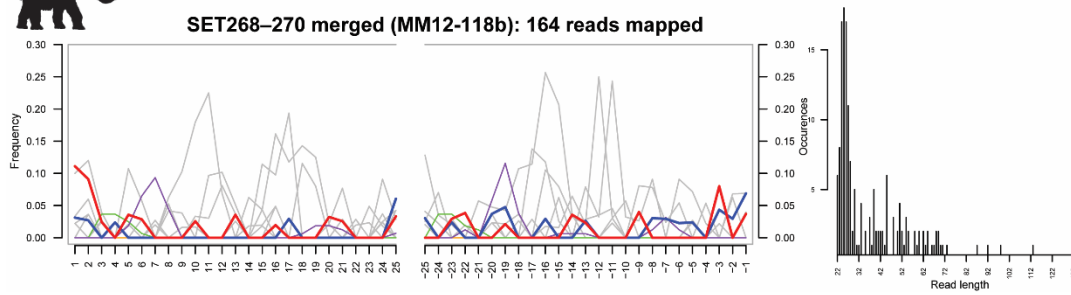

908  
909  
910

Minimum length = 24 bp, minimum mapping quality = 30.

911 **Figure E13** Metagenomic comparison of extraction and library blanks, all reads (not map-  
 912 filtered), absolute counts (non-normalized).

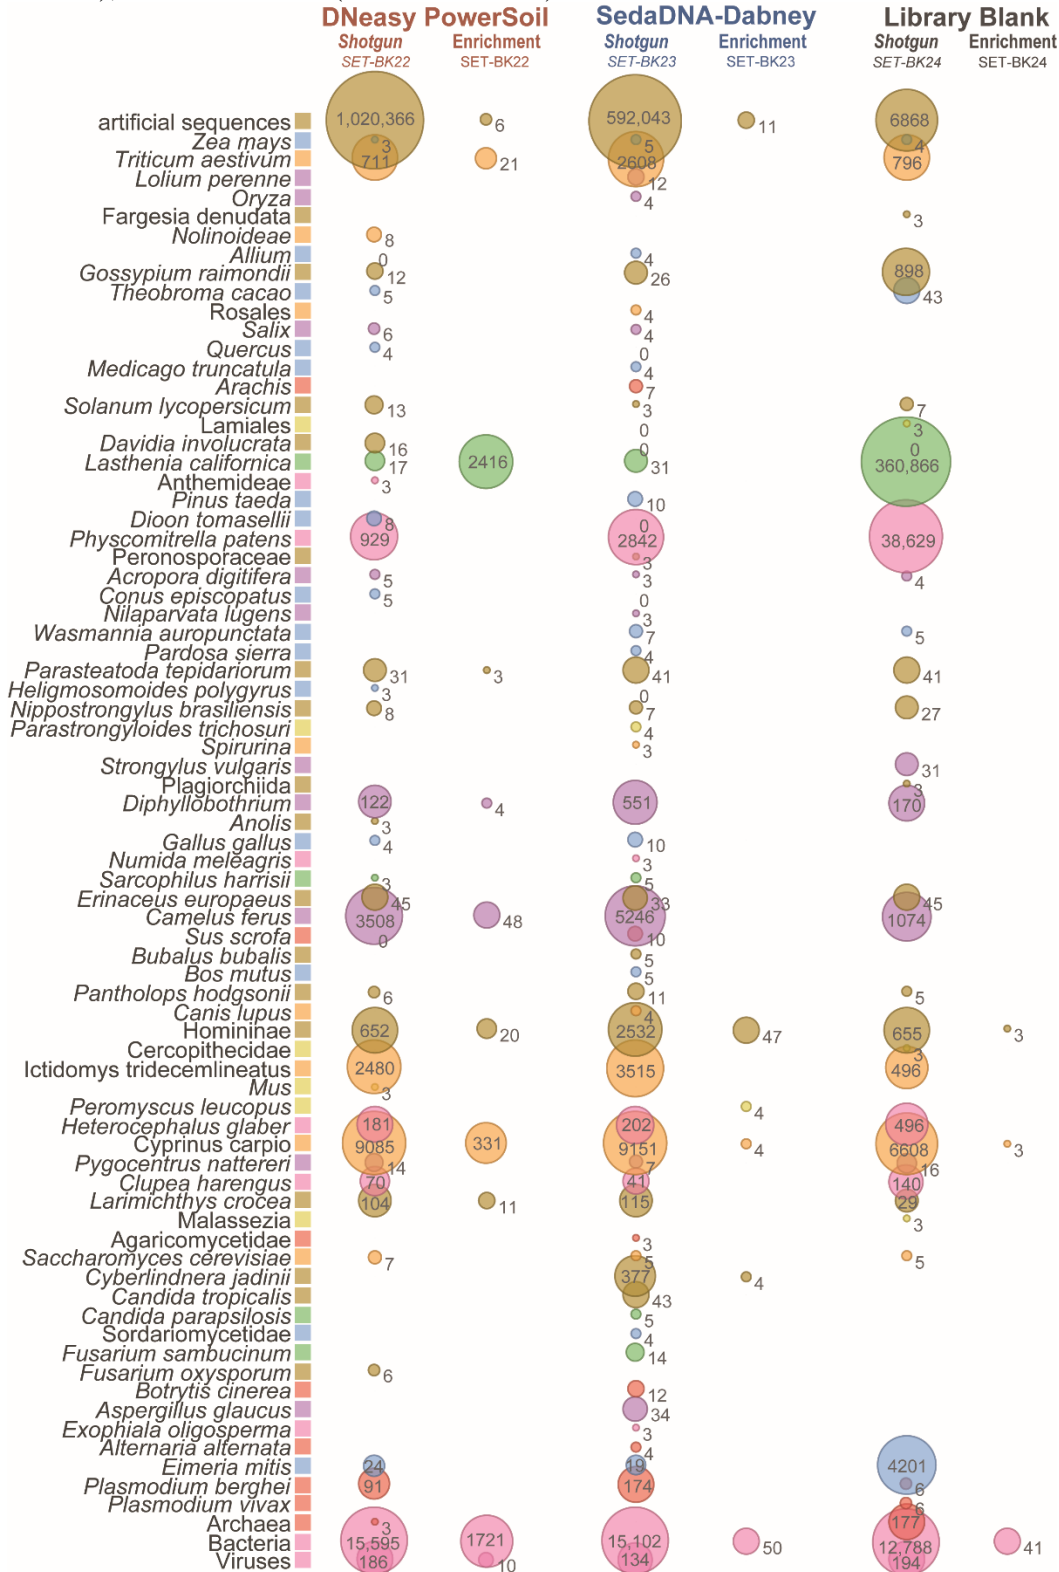

913 Values indicate total reads assigned to that taxon node.  
 914  
 915

916 **Figure E14** Components of the inhibition index.

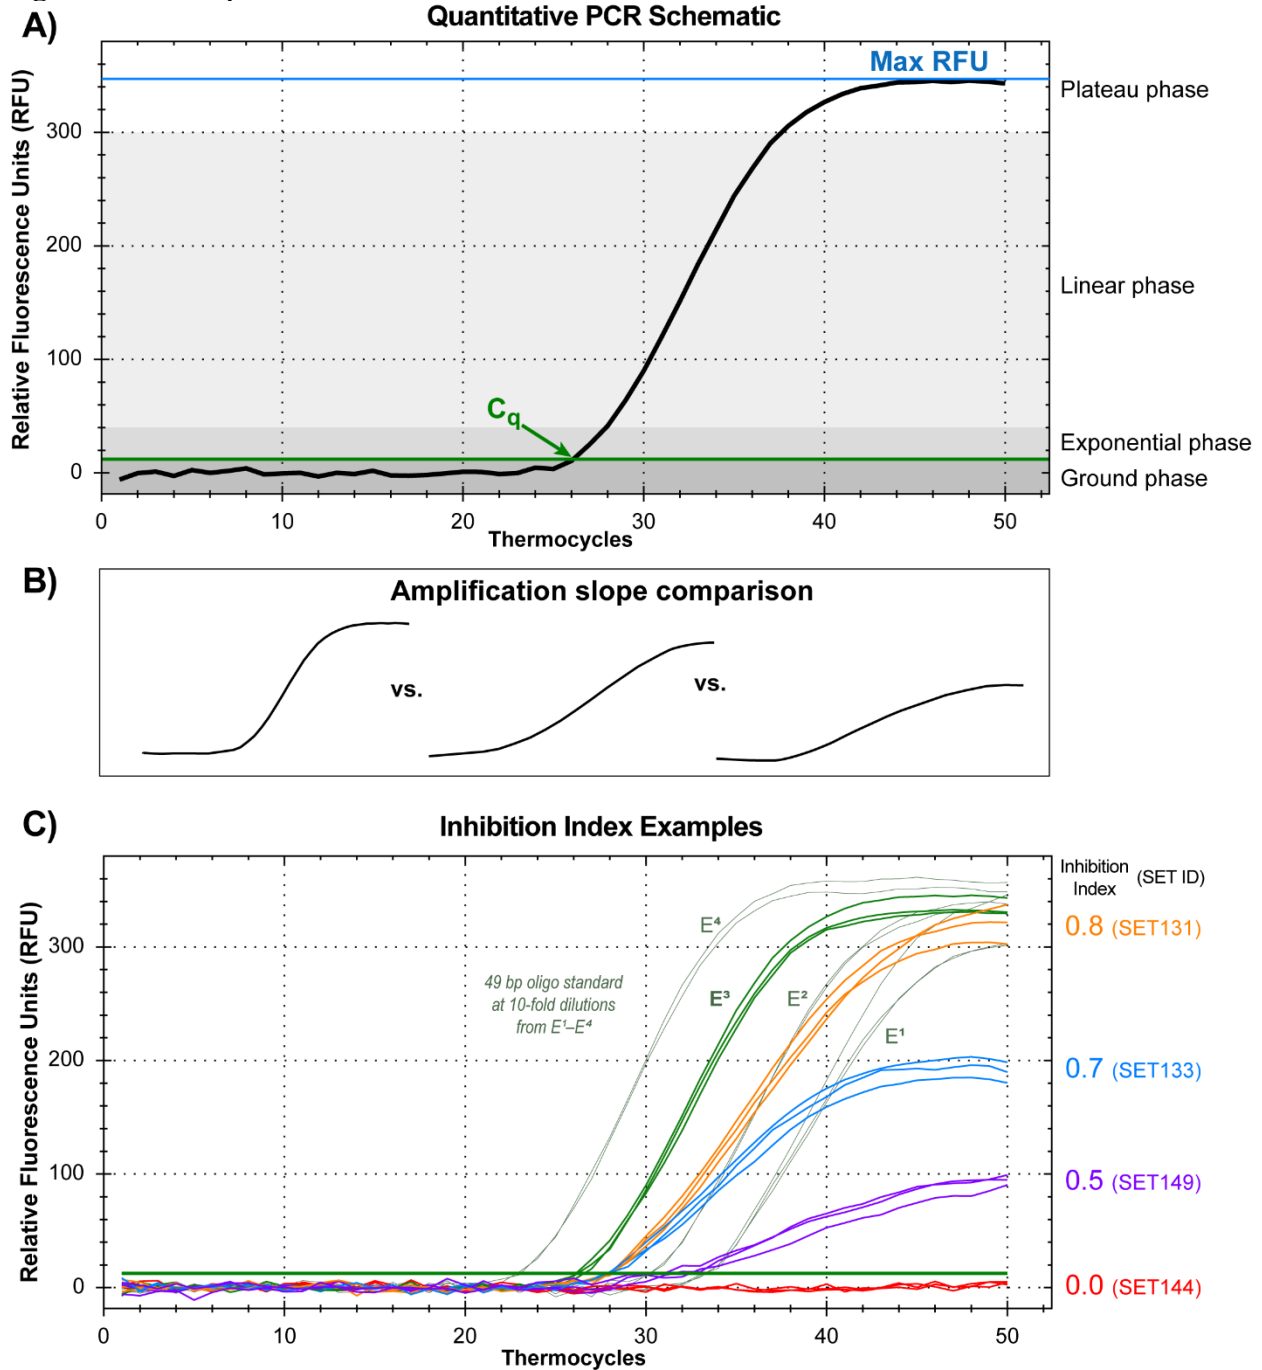

917  
 918 **A)** A standard qPCR reaction showing  $C_q$  and max RFU. **B)** A comparison of various amplification slopes from a  
 919 typical reaction (left), towards increasingly inhibited reactions (right). **C)** Example inhibition indices derived from  
 920 averaging the  $C_q$ , max RFU, and by fitting a variable-slope sigmoidal dose-response curve to the raw fluorescence  
 921 data (using GraphPad Prism v. 7.04) based on King et al.(2009) for each PCR replicate by sample against the spiked  
 922  $E^3$  standard. Inhibition index values  $<0.5$  tend to occur when individual PCR replicates fail in a triplicate series;  
 923 blanks and standard serial dilutions  $E^2$  and  $E^1$  tend to have inhibition indices  $>0.9$  despite their 10- and 100-fold  
 924 reduction in starting DNA causing a 3 or 6 cycle  $C_q$  shift. QPCR standard curve:  $E = 94.2\%$ ,  $R^2 = 0.997$ , slope =  
 925  $-3.469$ . See Table S7 for PCR assay specifications.
